# Supplementary material for: Differential Gene Expression between Fungal Mating Types Is Associated with Sequence Degeneration
Source: PubMed Central journal article supplement — Genome Biol Evol. 2020 Feb 14;12(4):243–58. doi: 10.1093/gbe/evaa028 (PMC7150583; doi:10.1093/gbe/evaa028), 2020-02-14
Supplement: evaa028_supplementary_data.pdf [file evaa028_supplementary_data.pdf]

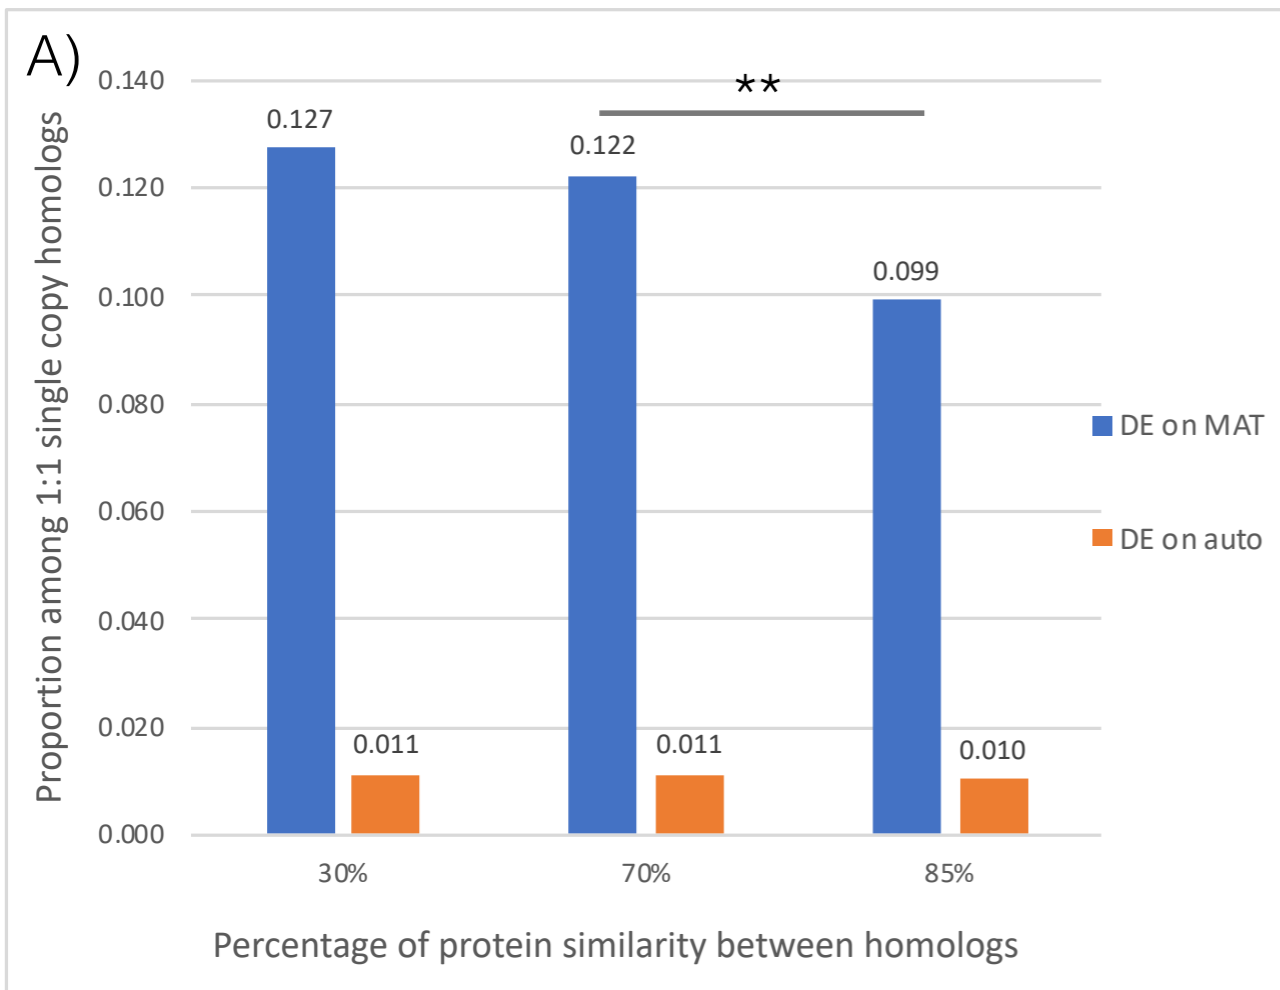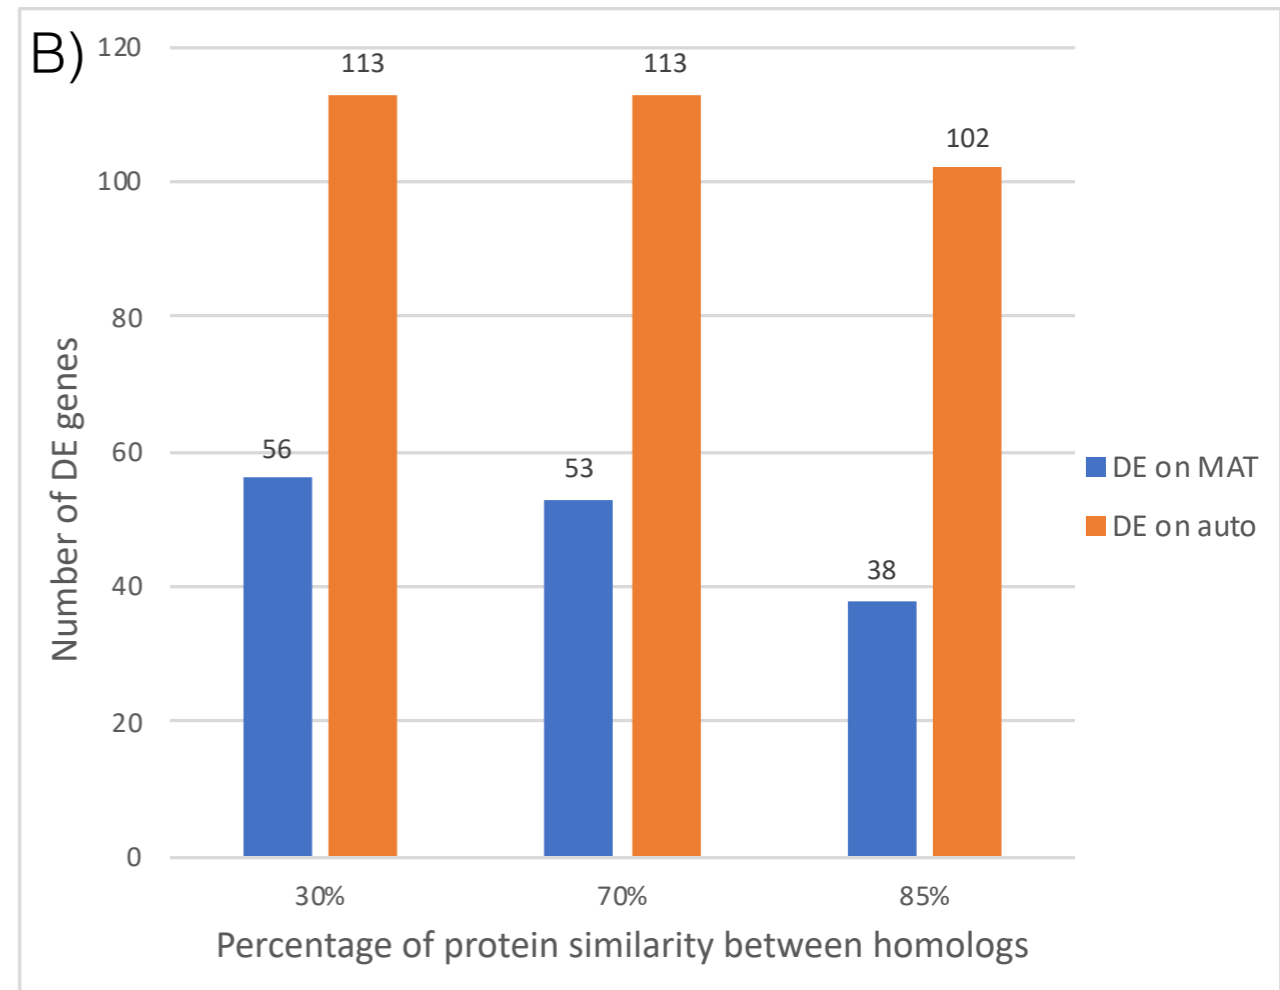

**Fig. S1**

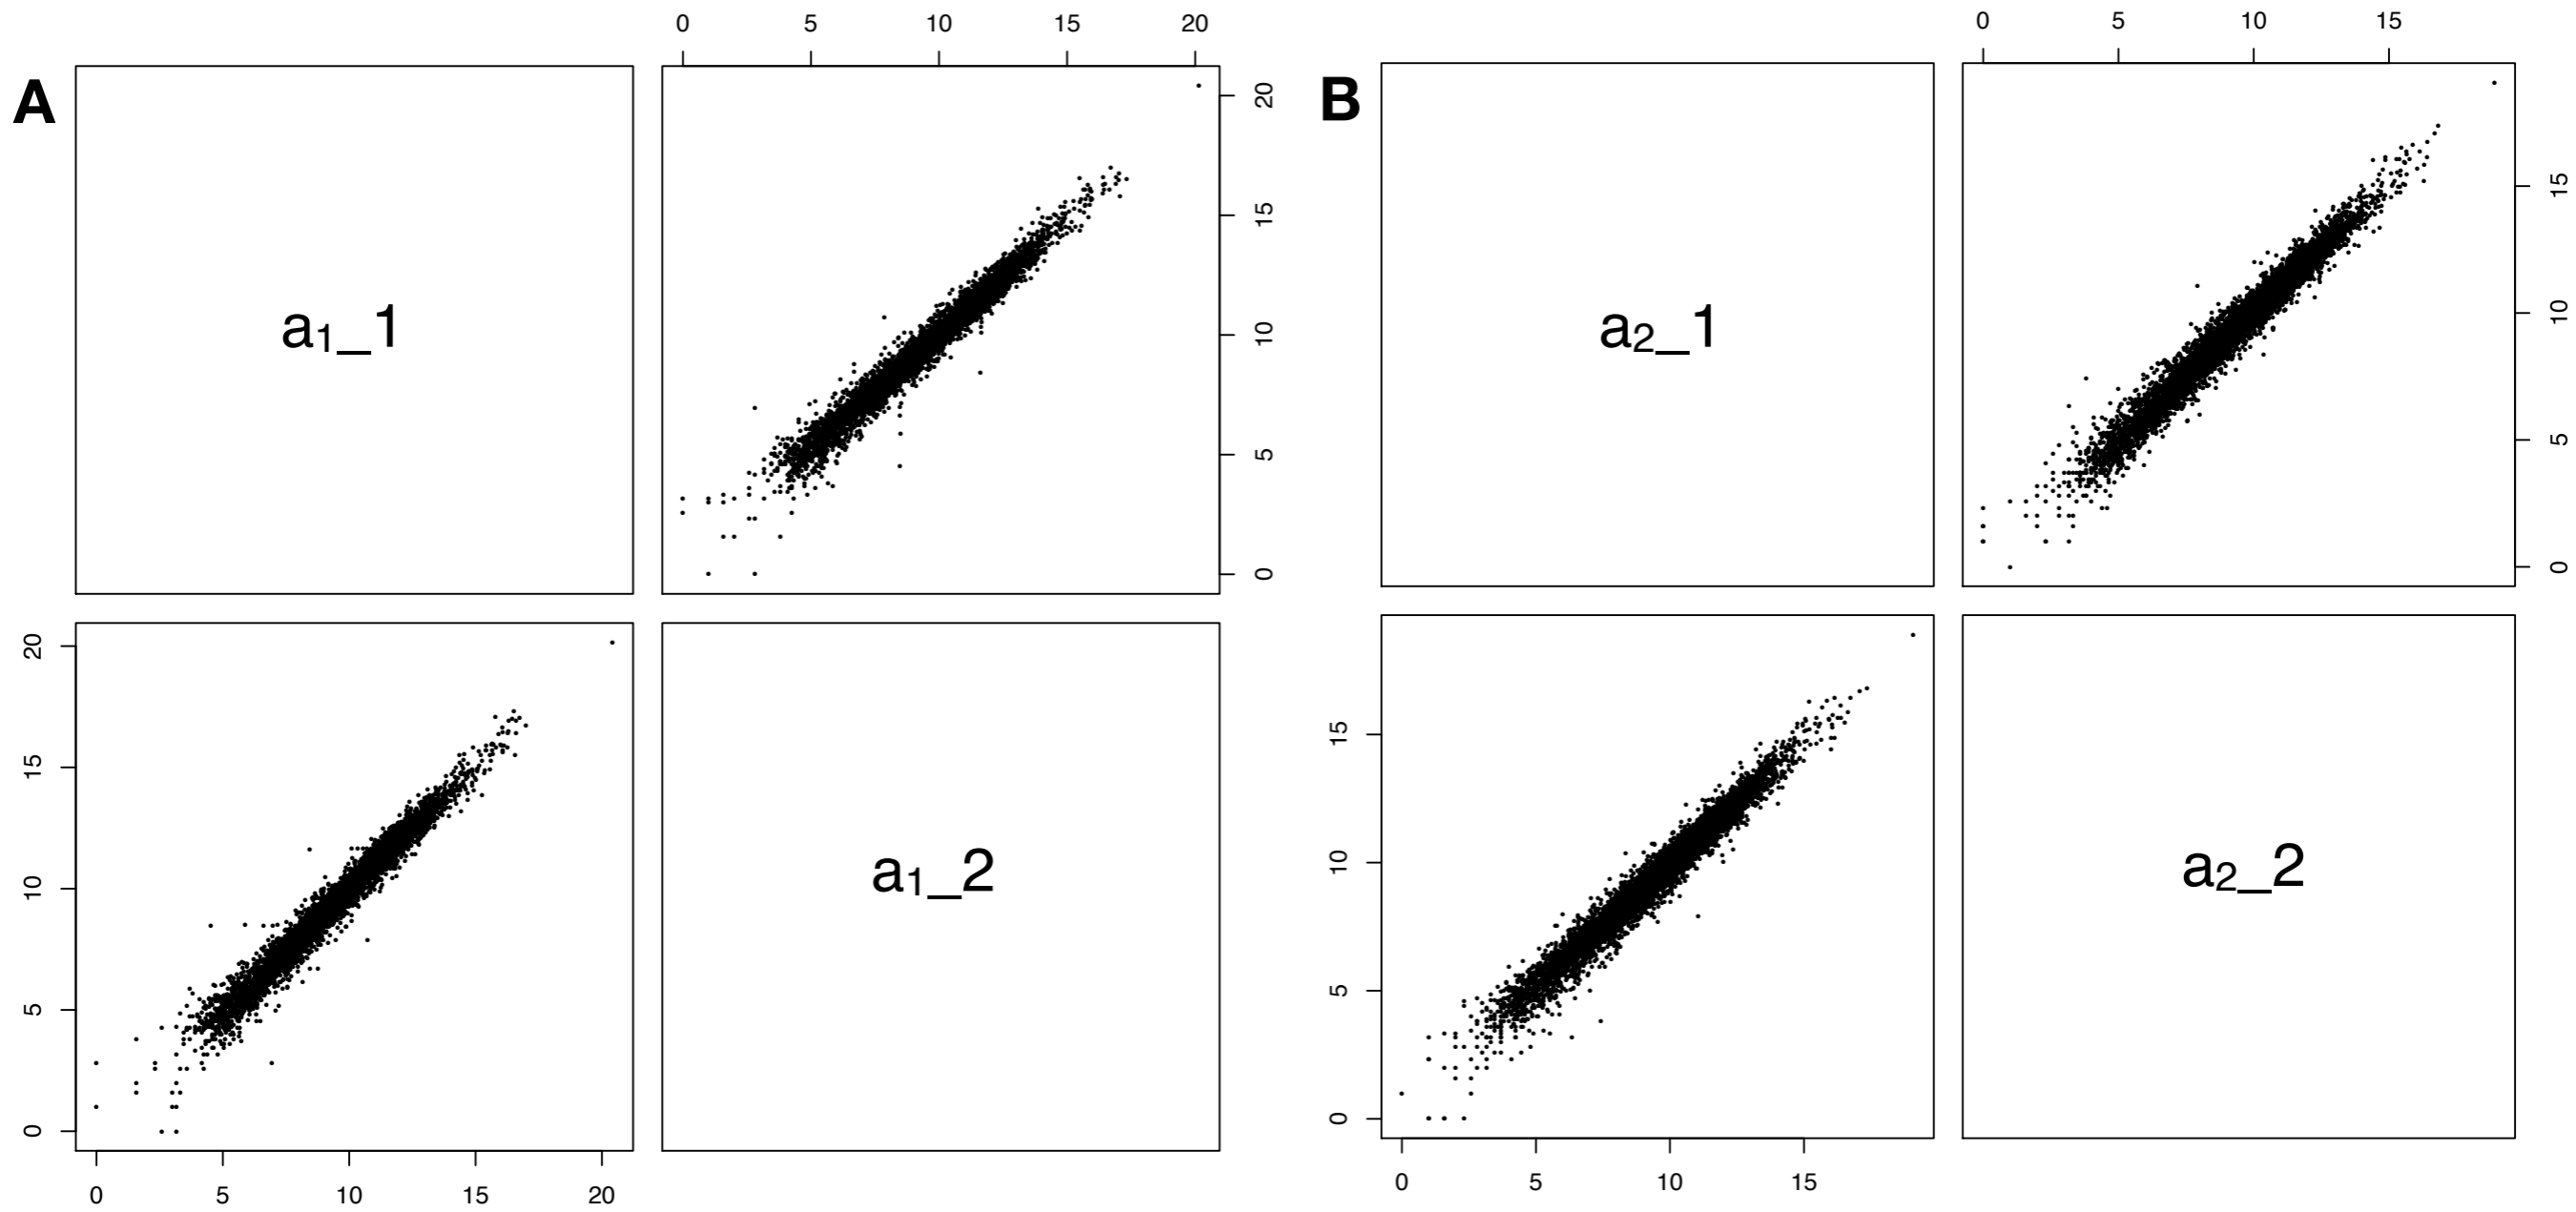

**Fig. S2**

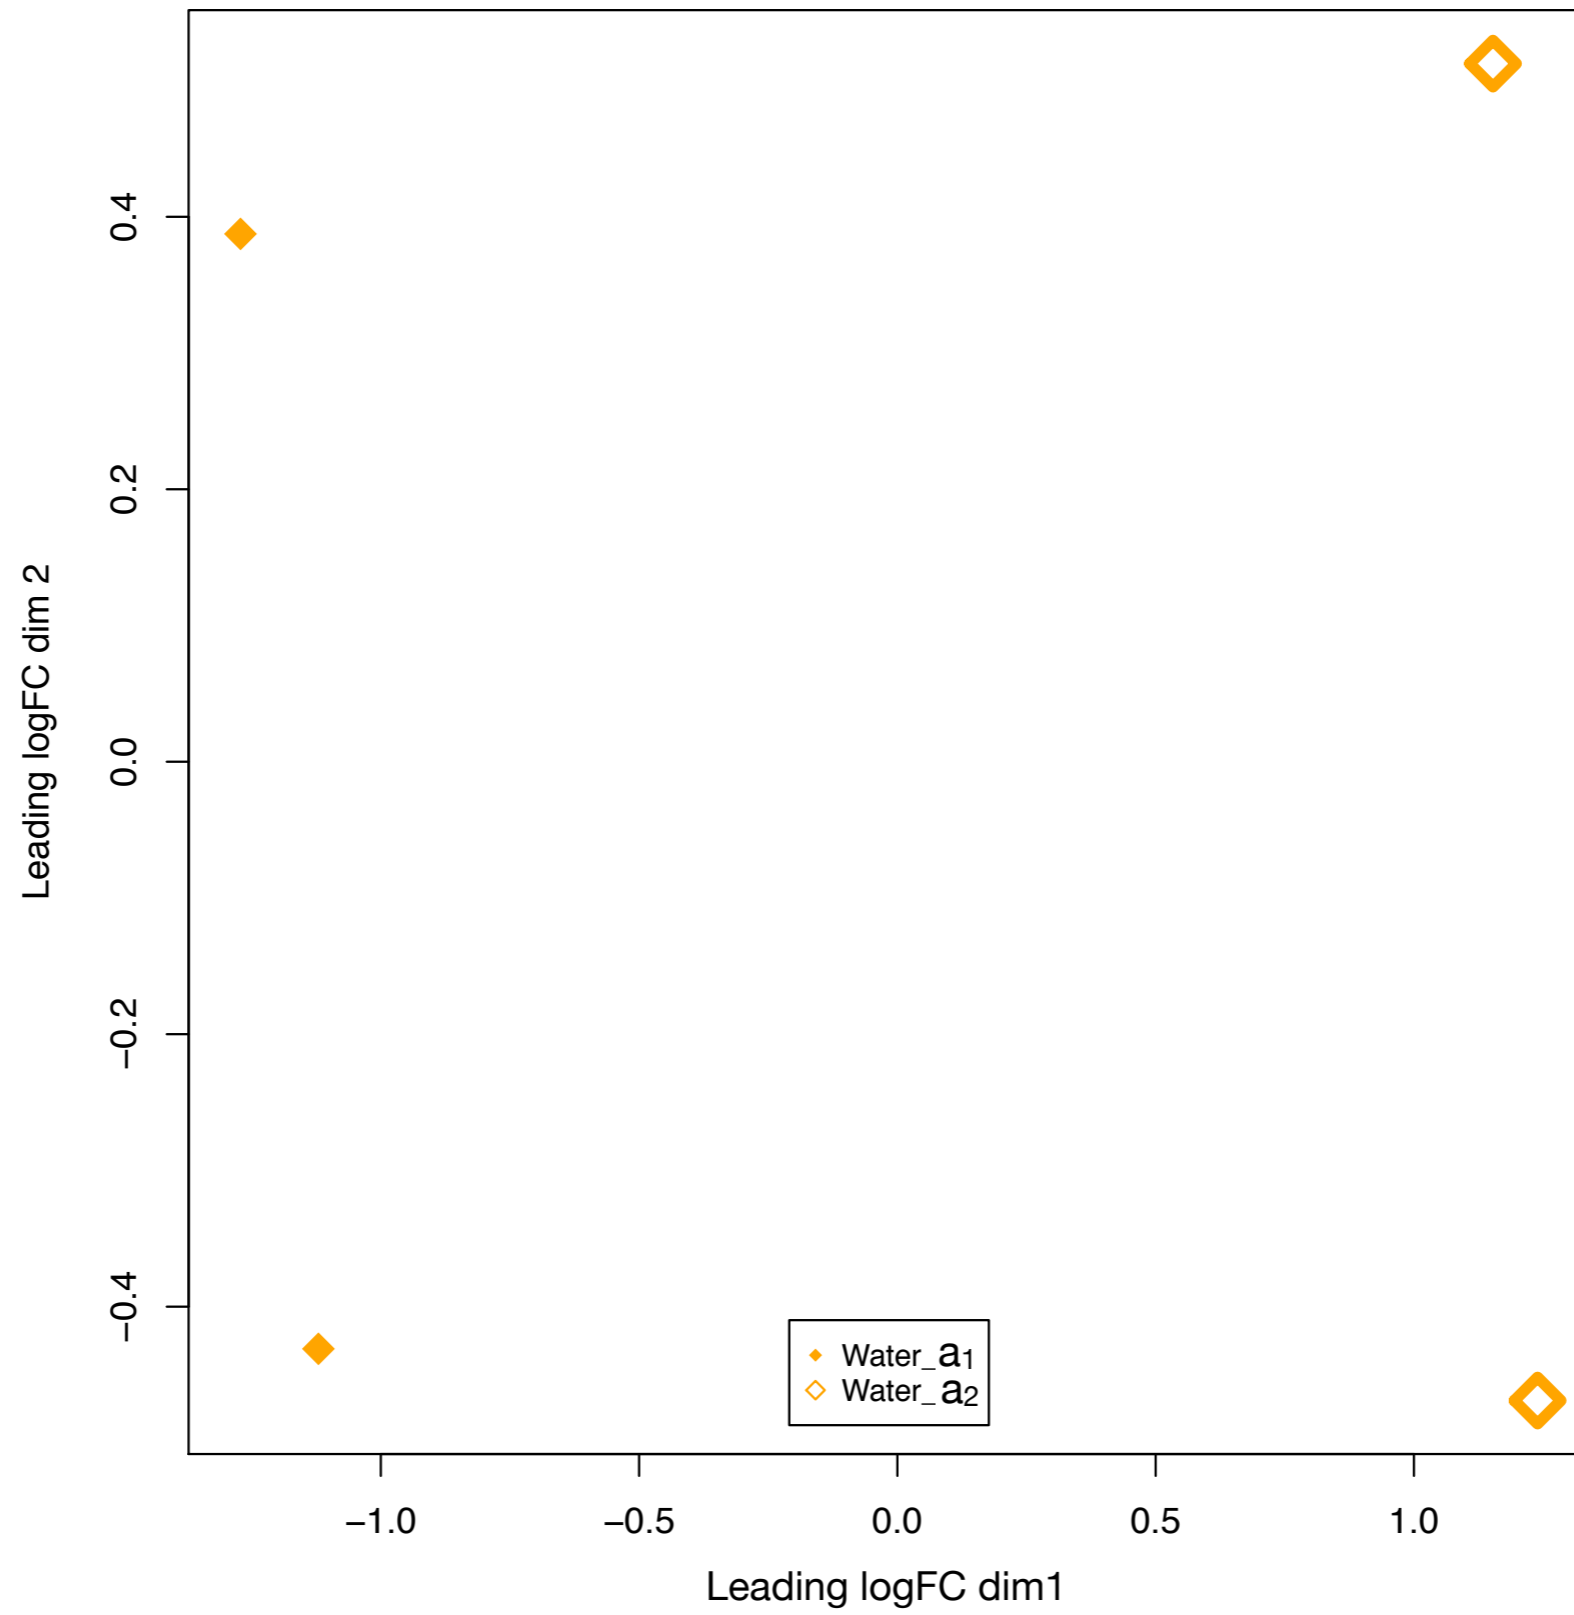

**Fig. S3**

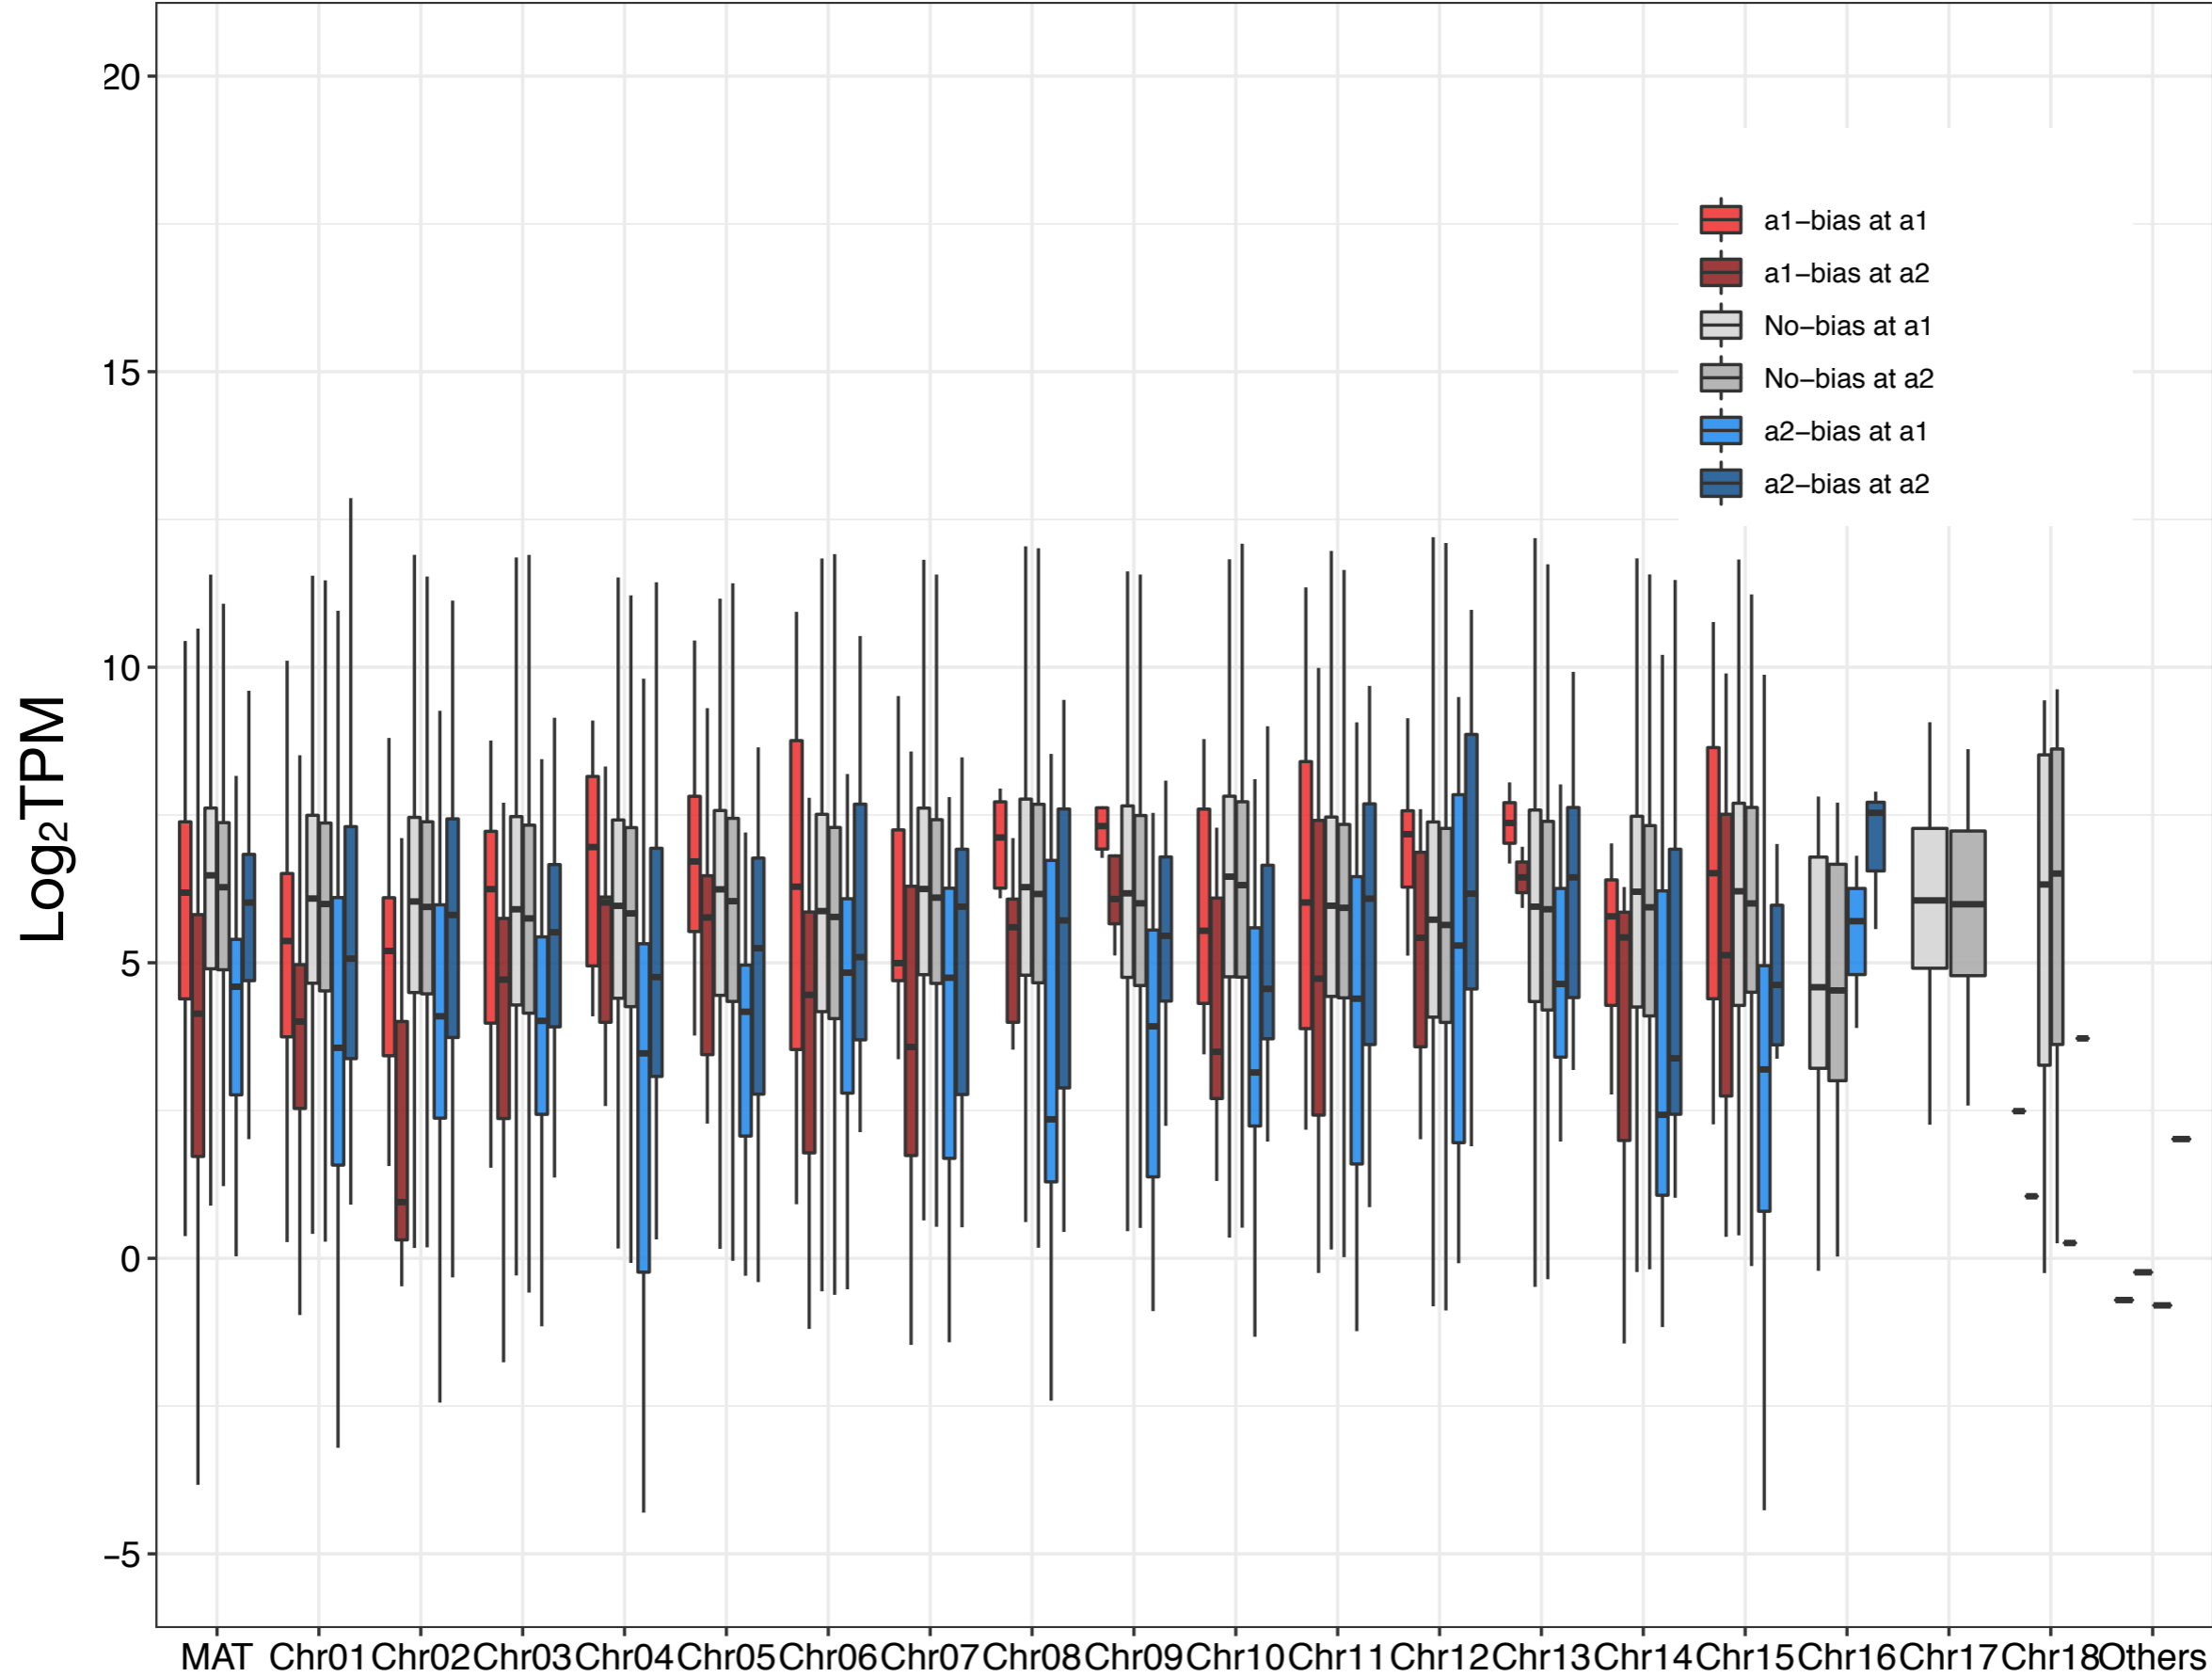

Chromosomes

**Fig. S4**

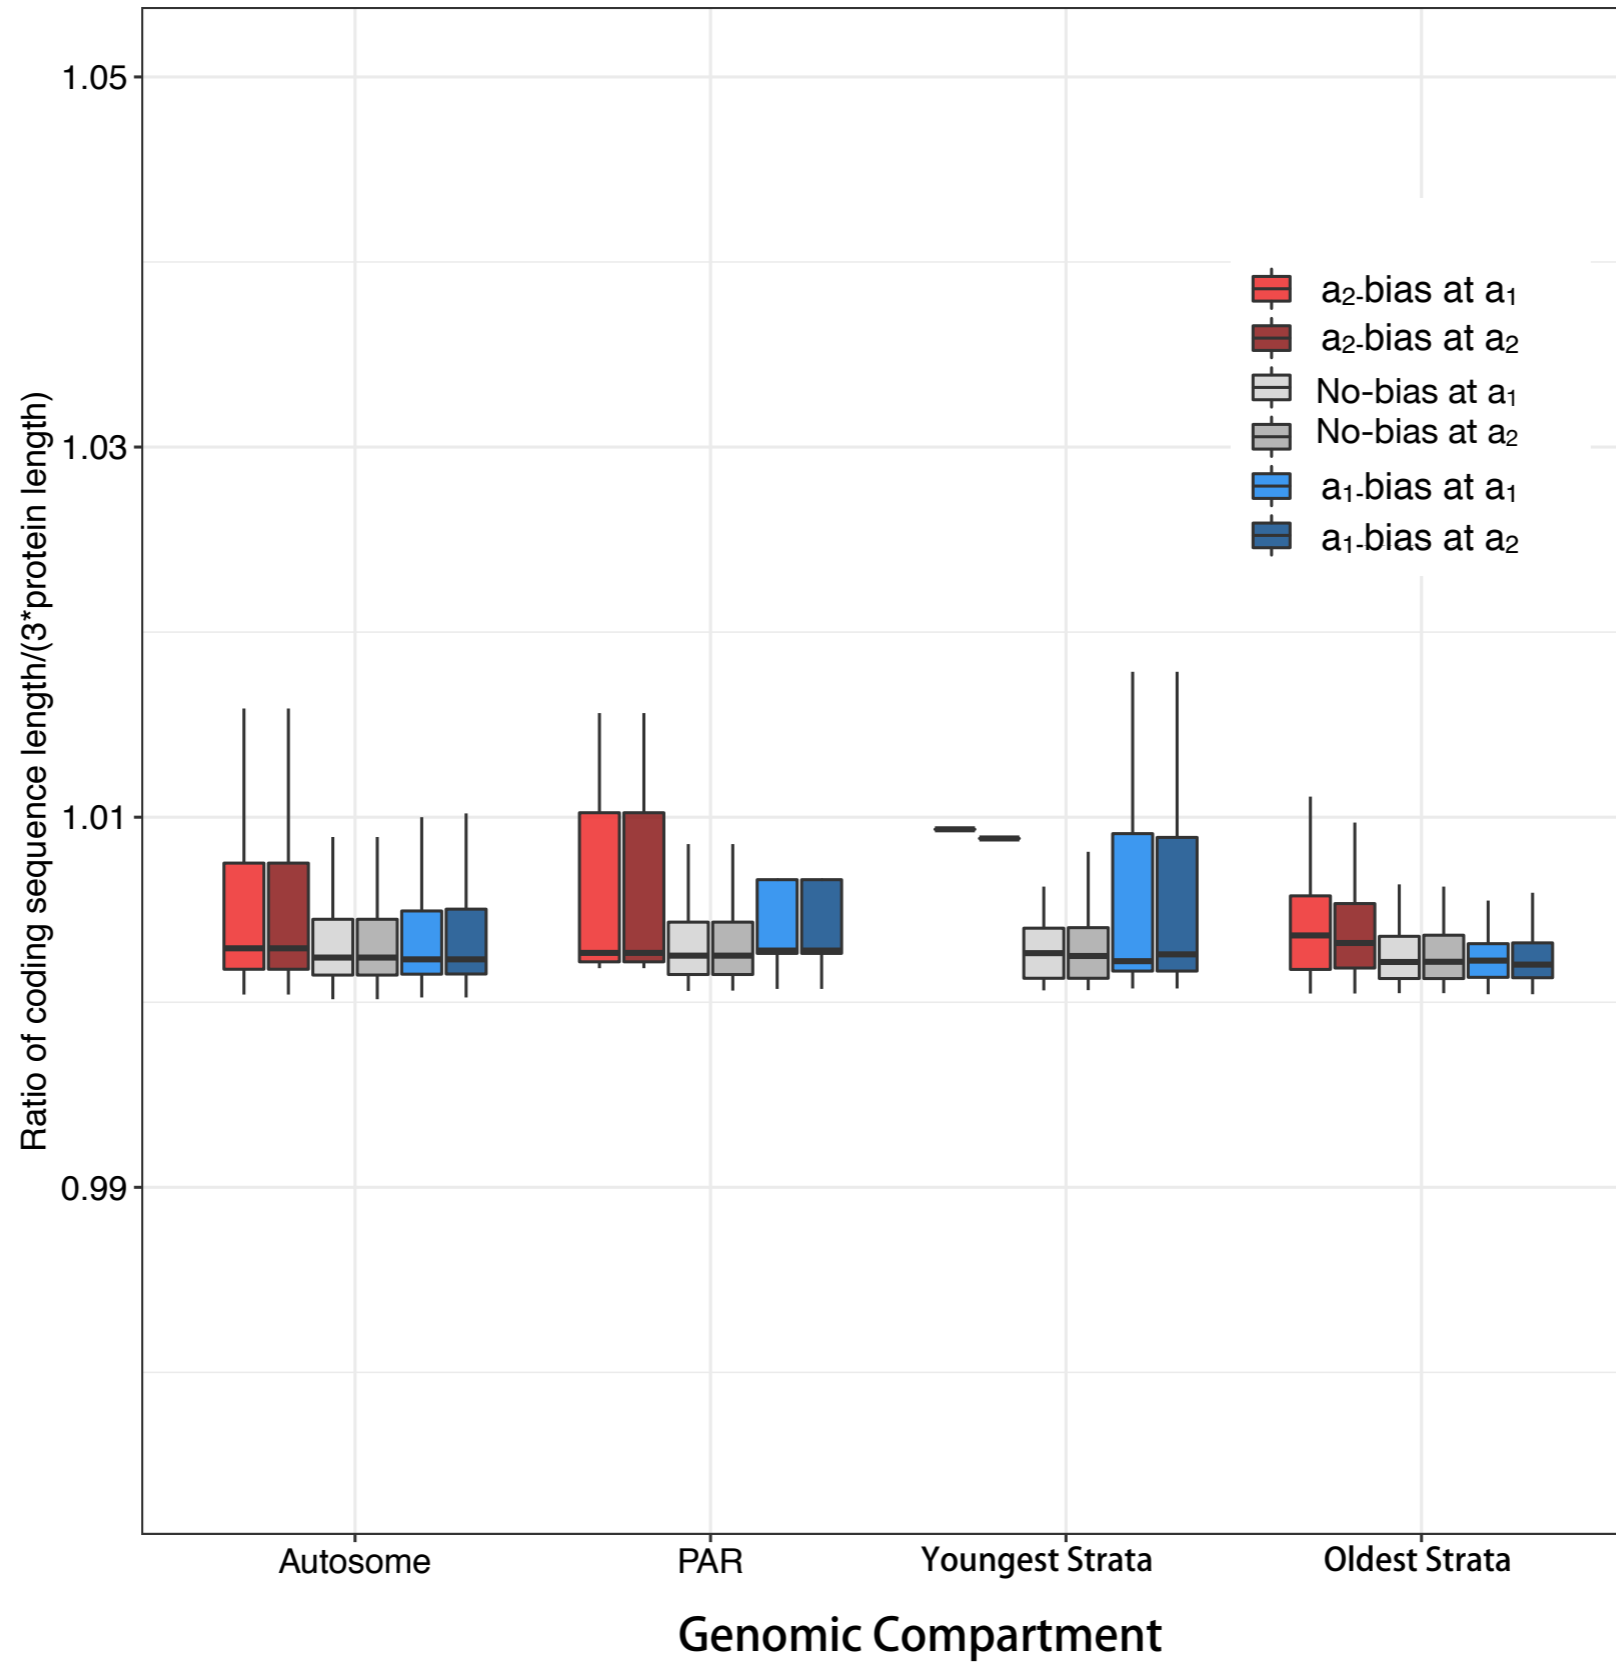

**Fig. S5**

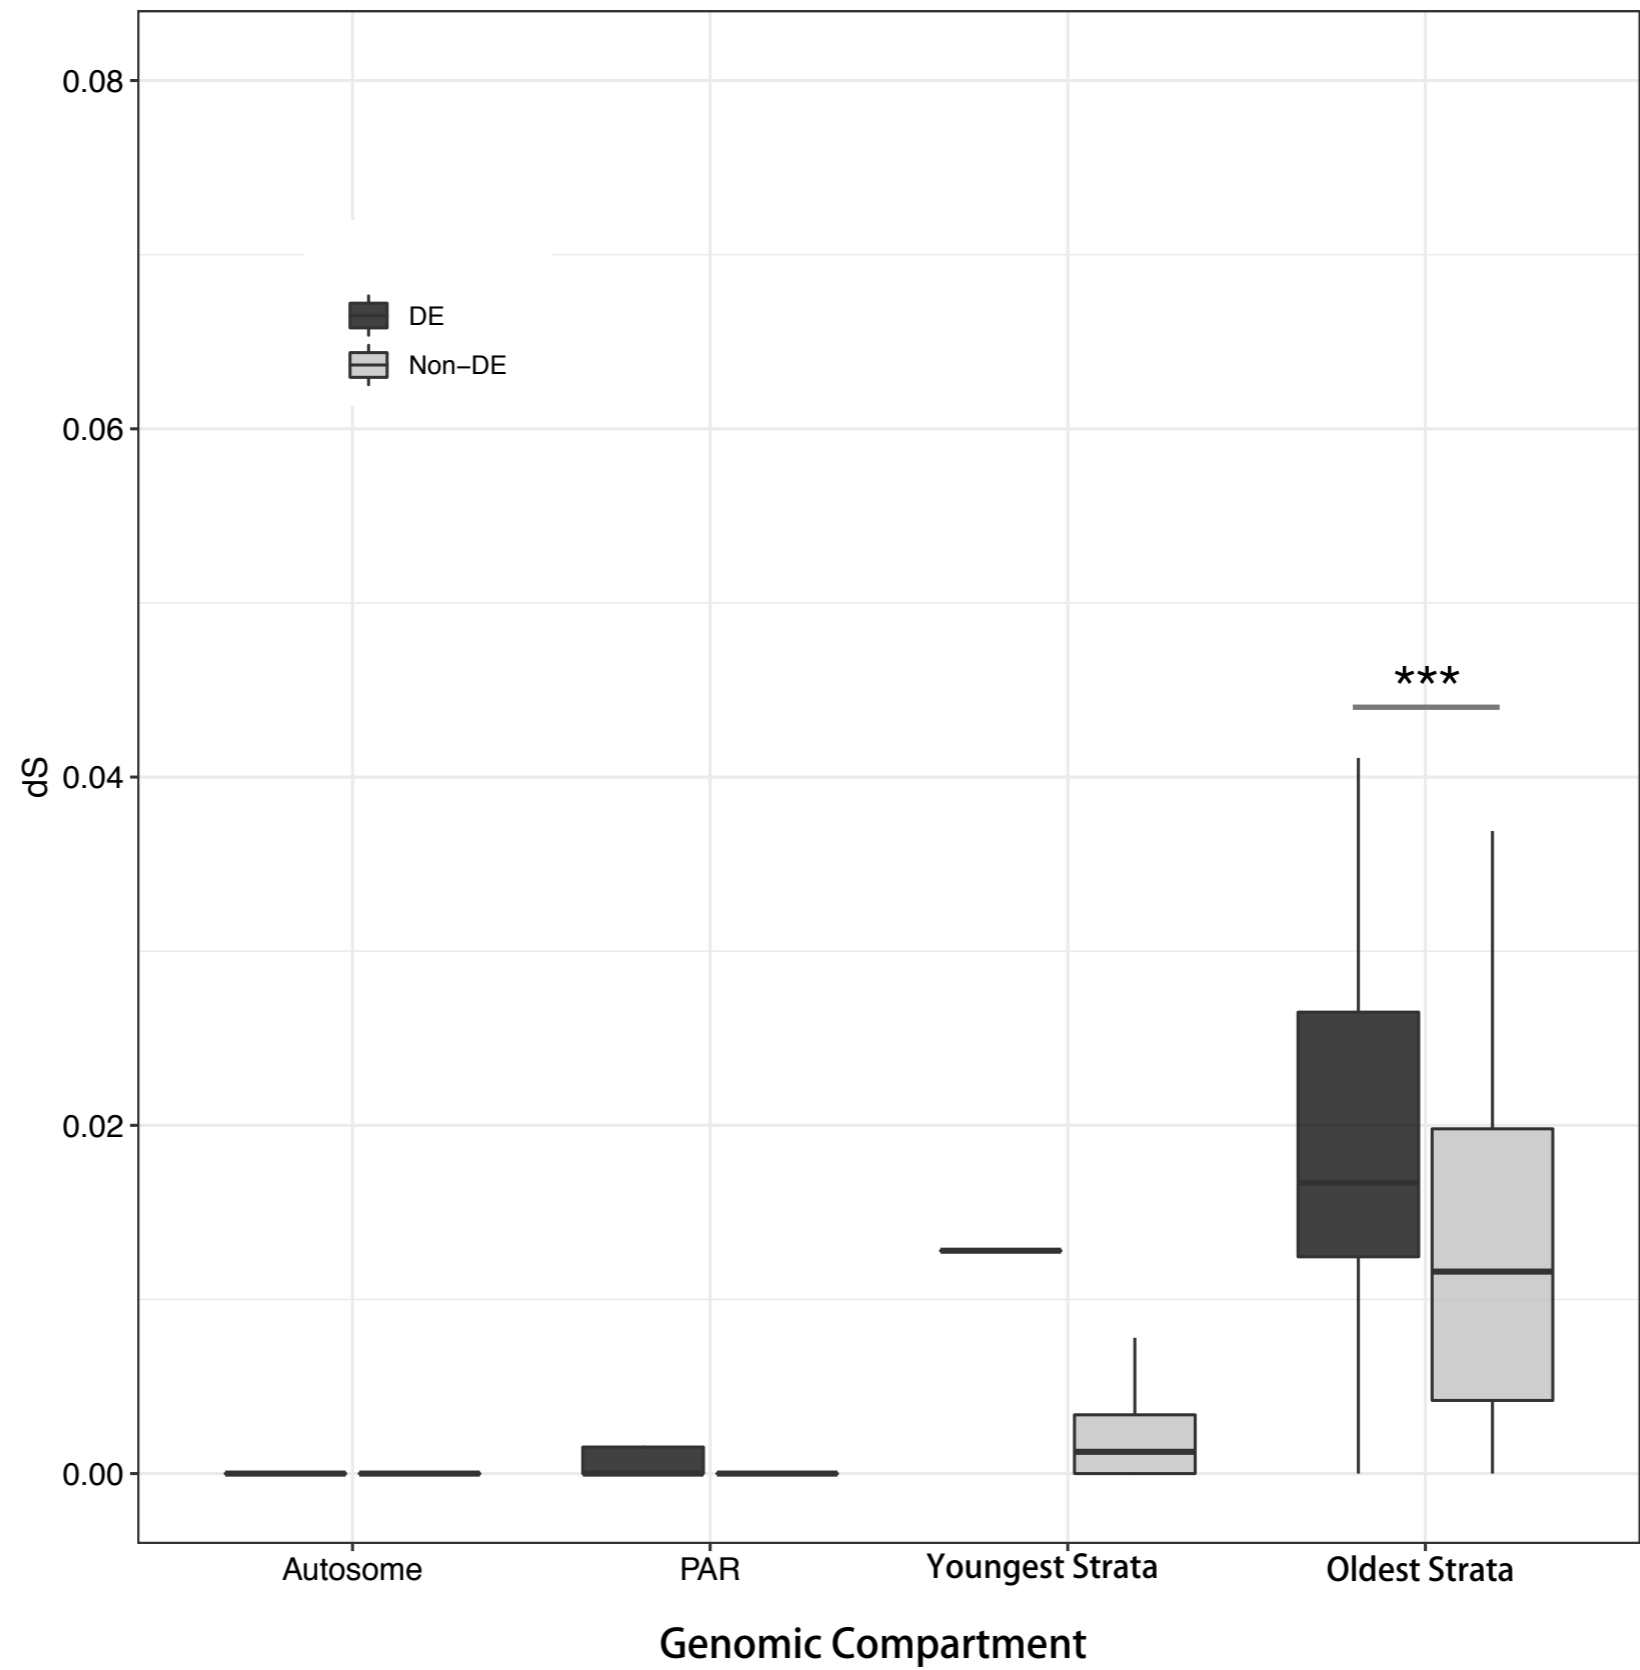

**Fig. S6**

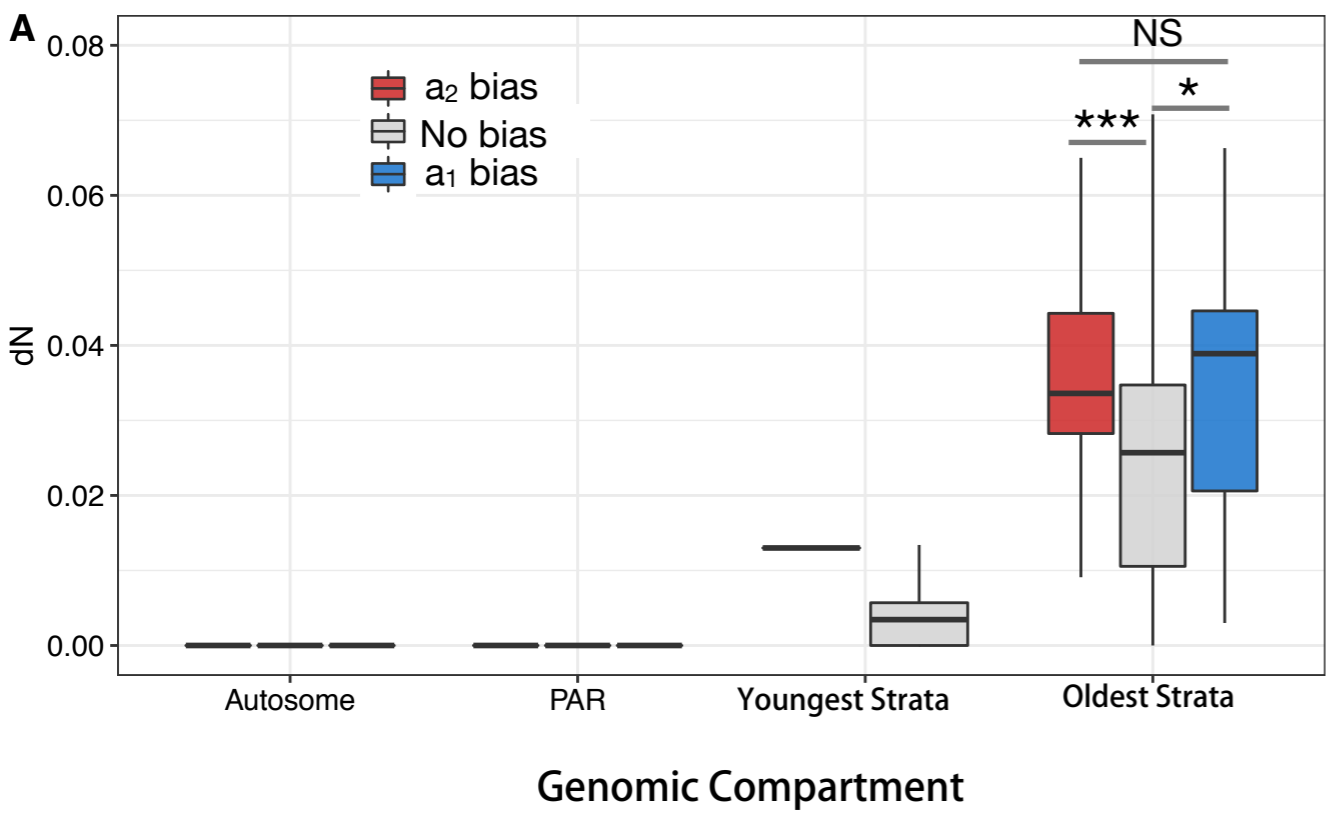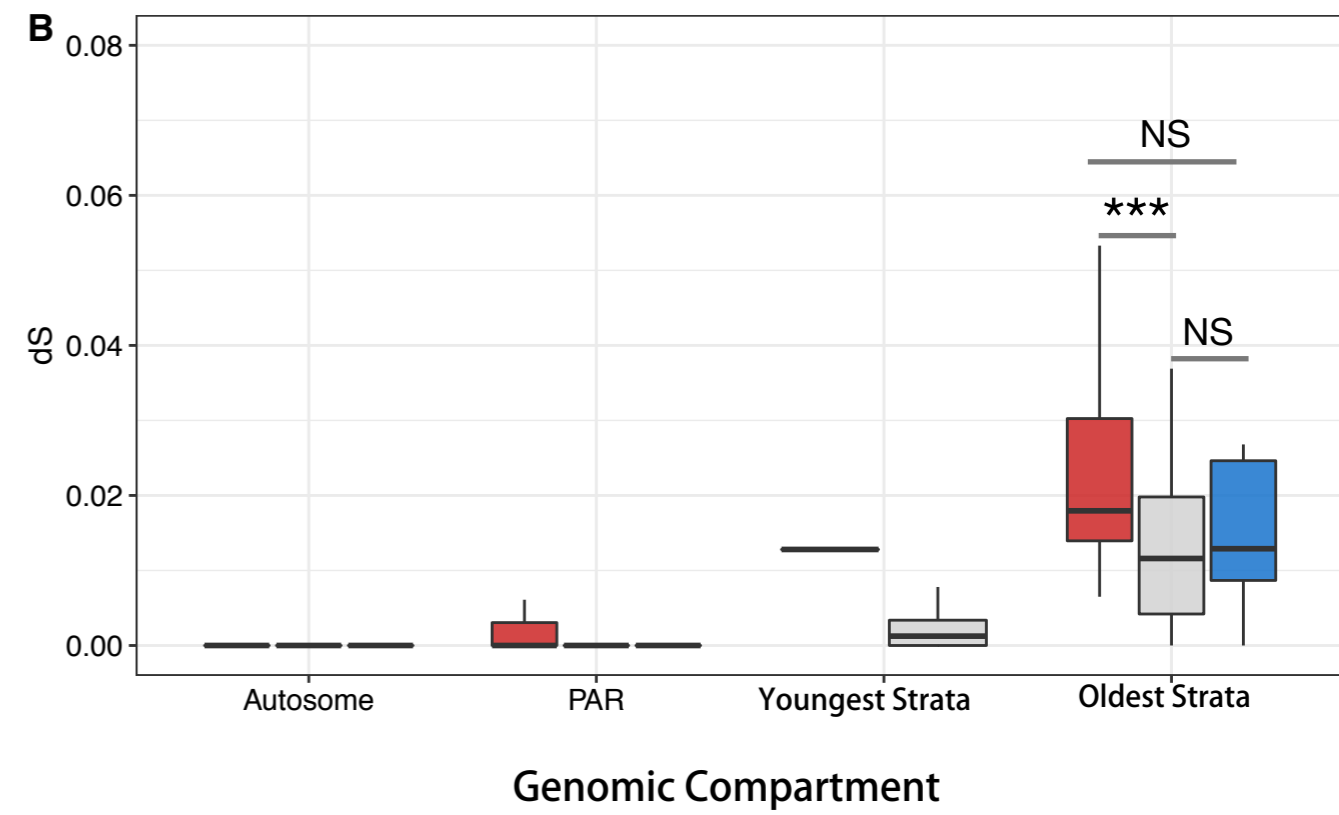

**Fig. S7**

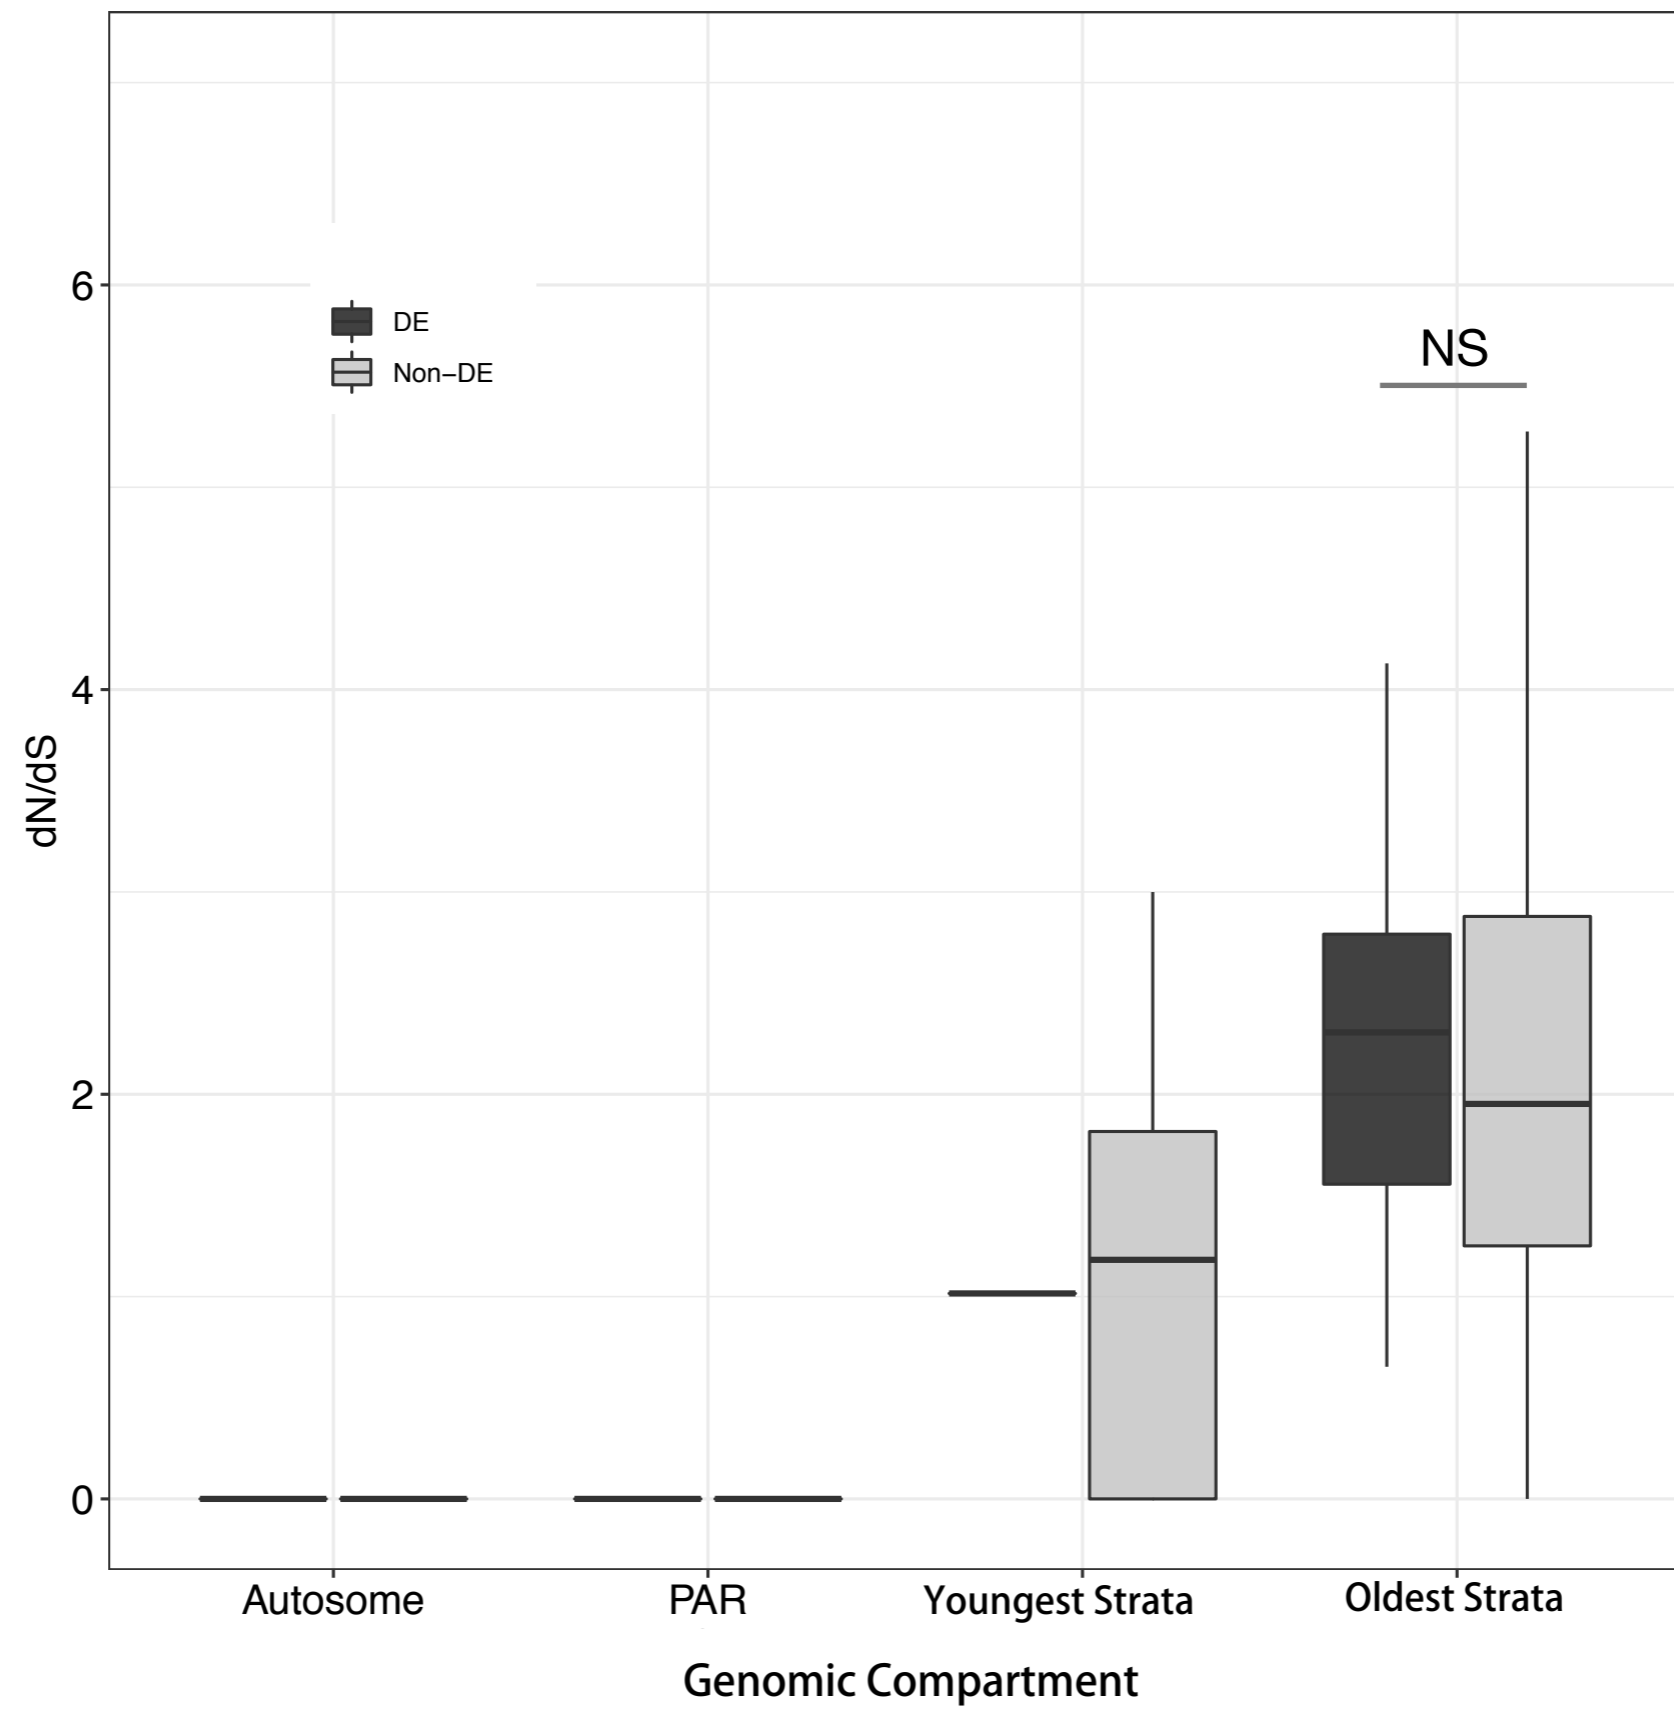

**Fig. S8**



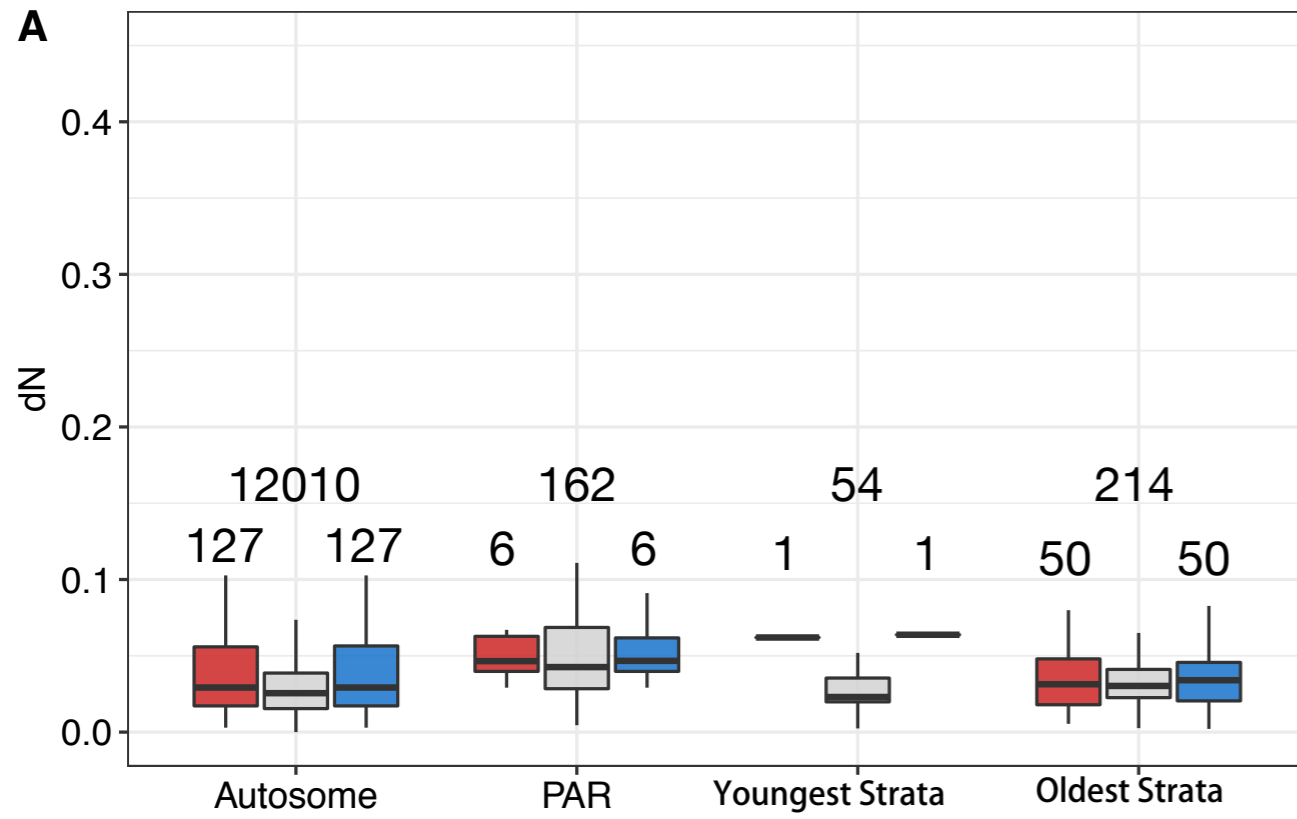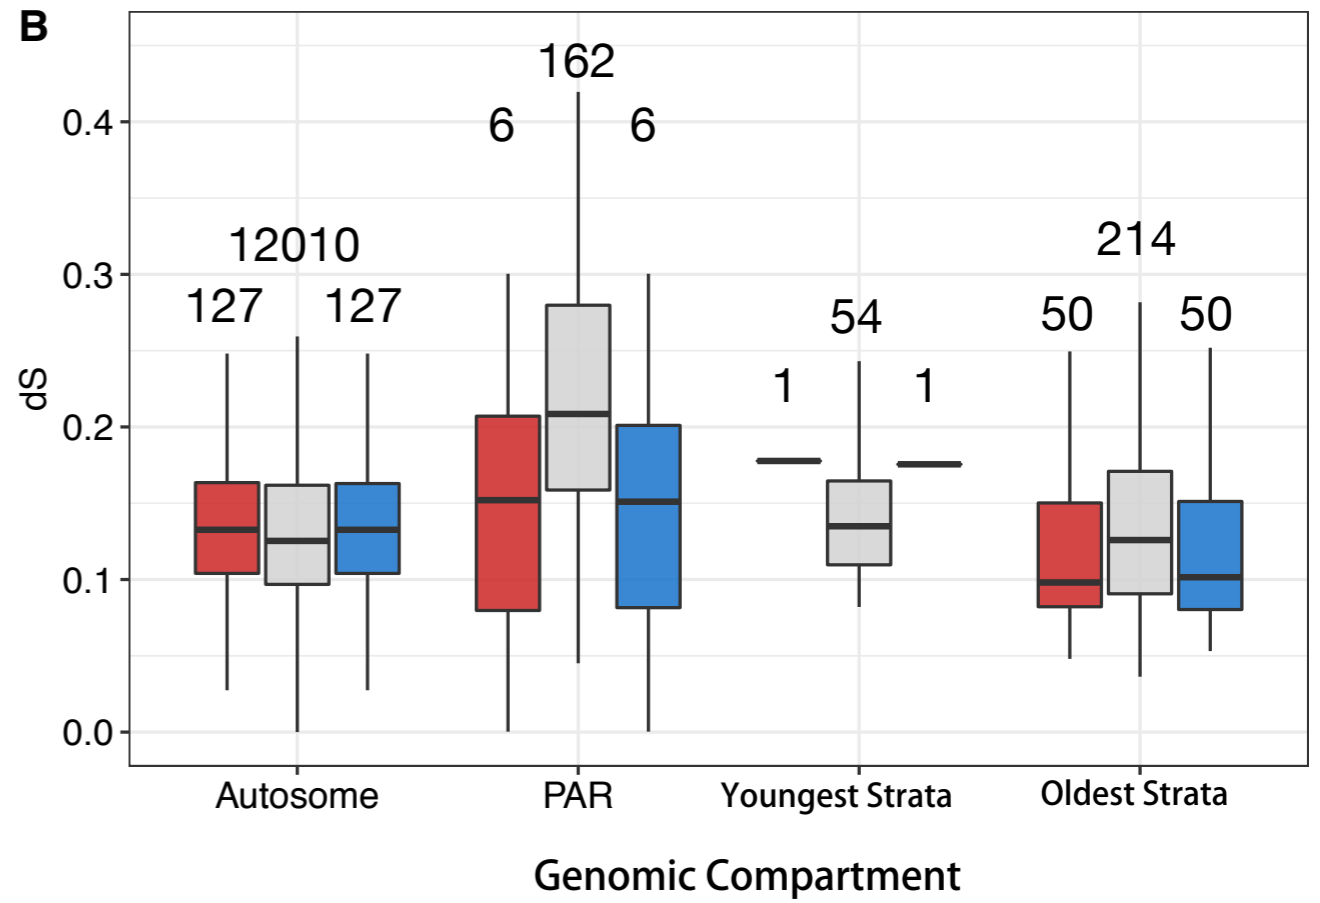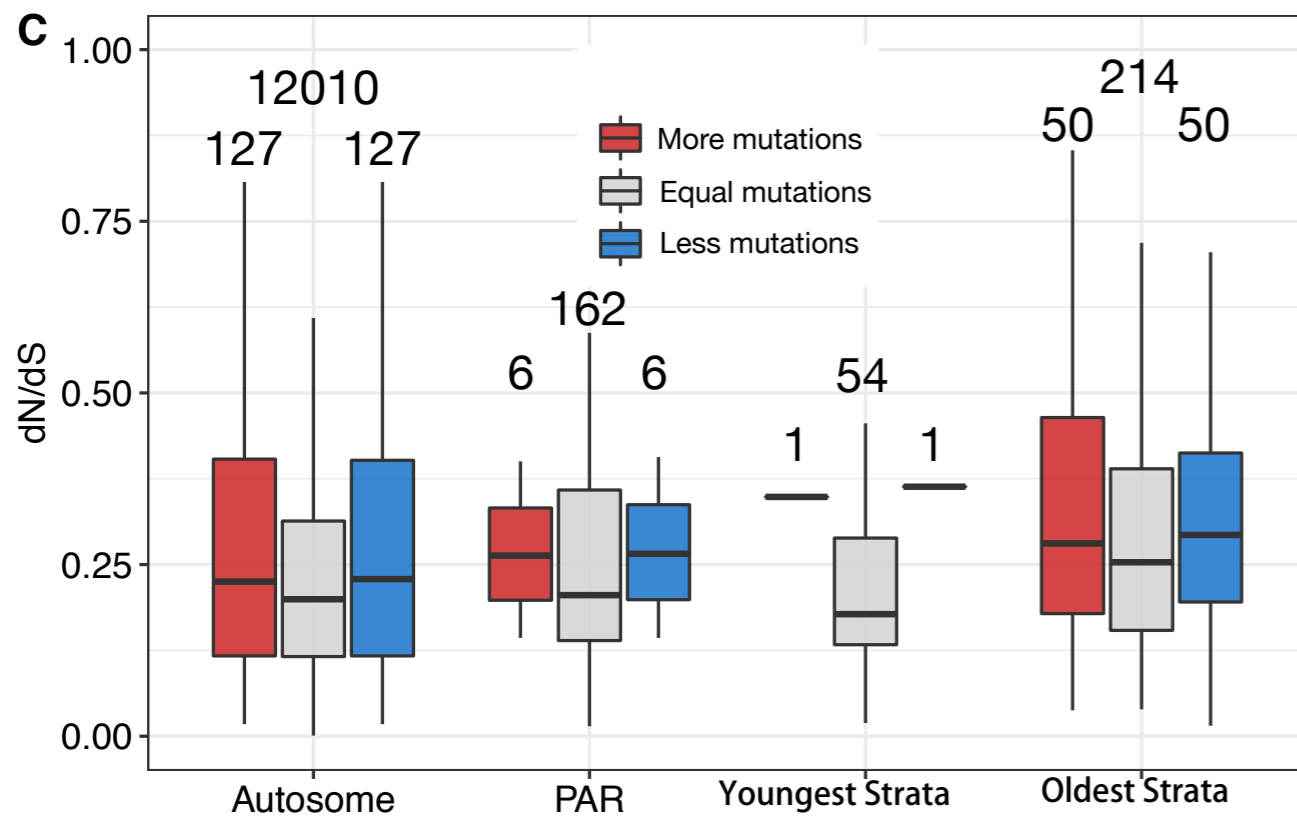

**Fig. S9**

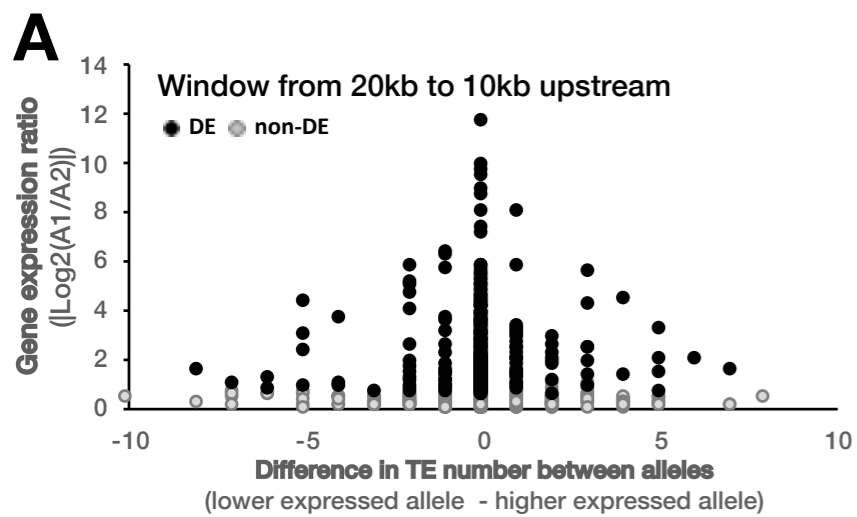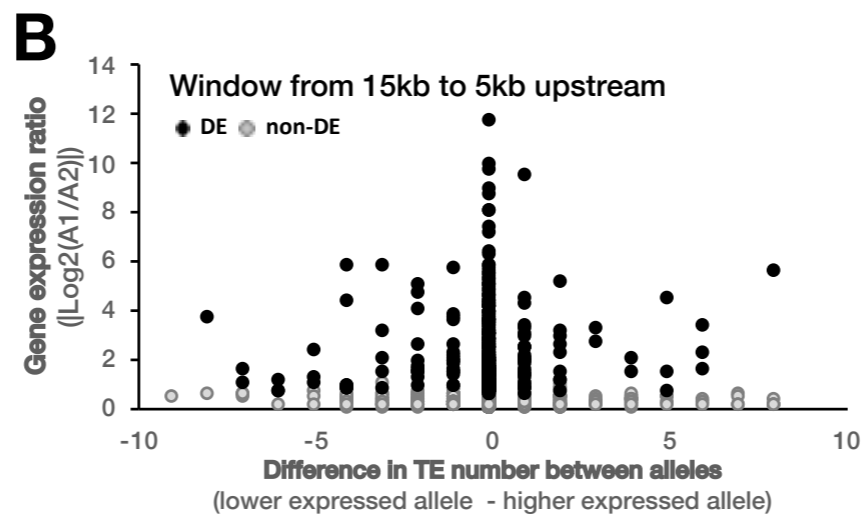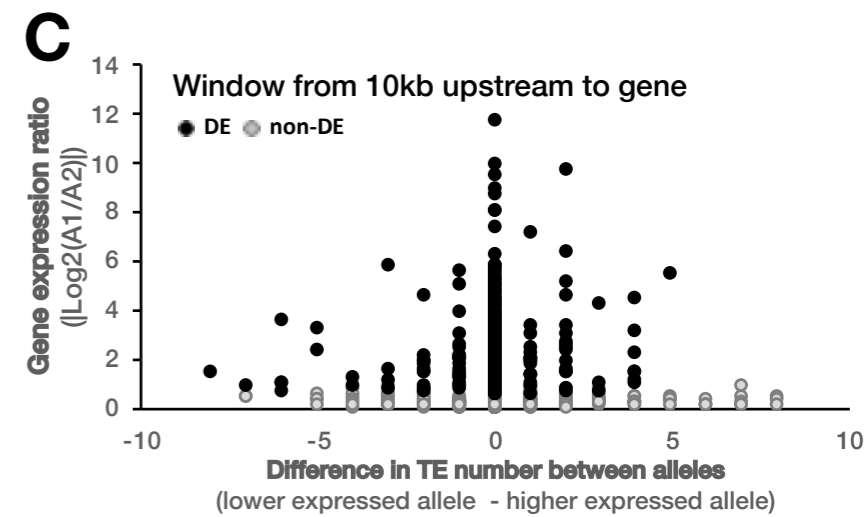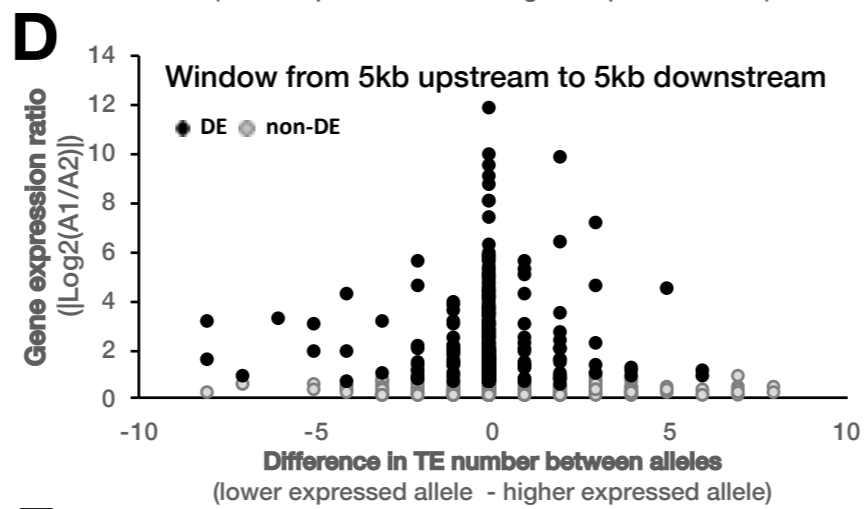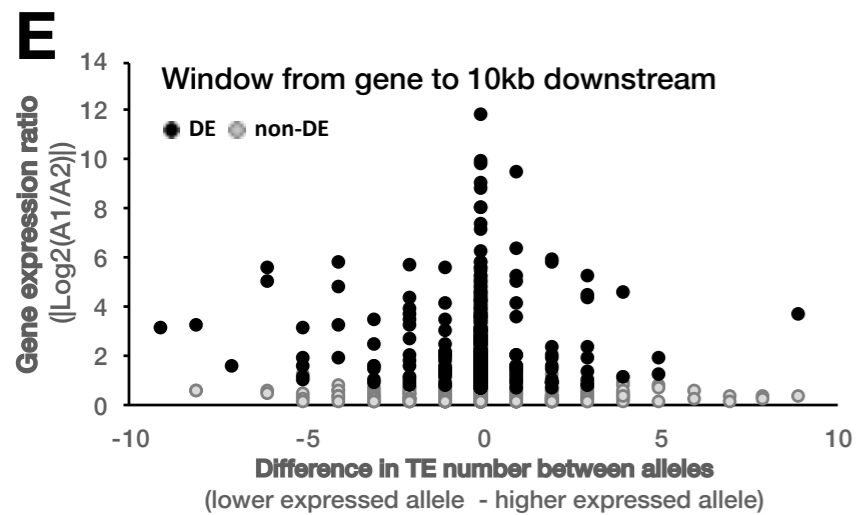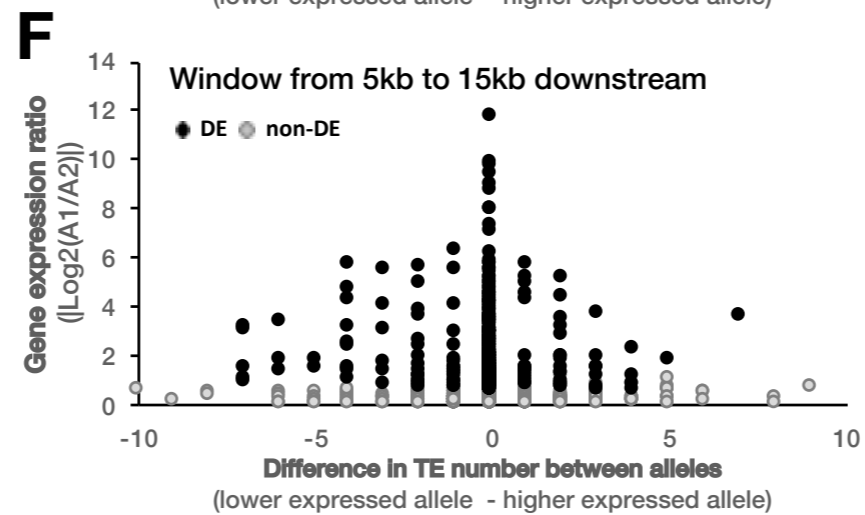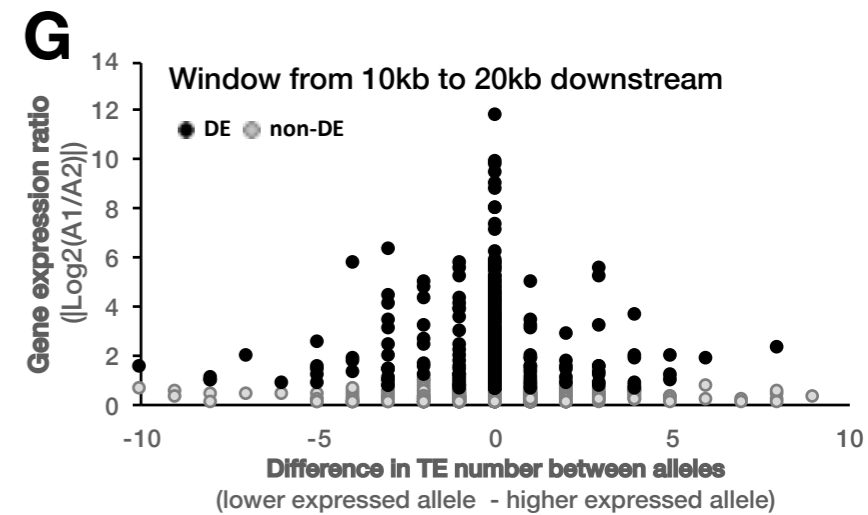

**Fig. S10**

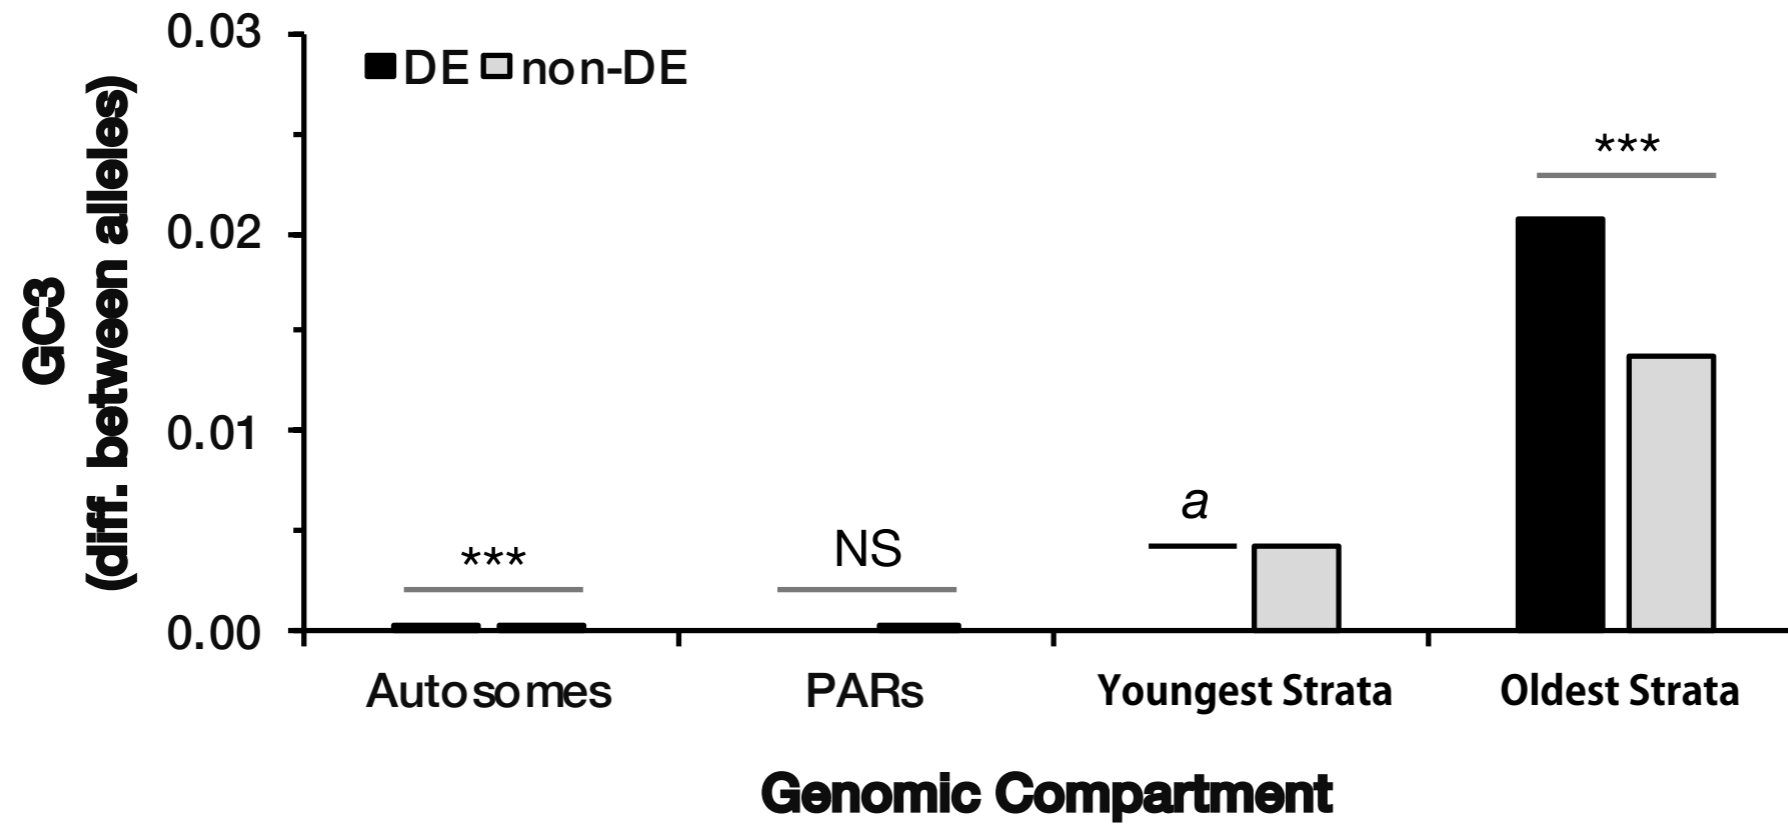

Fig. S11

**Table S1.** Number of single-copy genes with alleles in both  $a_1$  and  $a_2$  haploid genomes, with the 70% protein sequence identity detection threshold using reciprocal best BLASTp hits, before and after filtering out genes with transposable element (TE)-related functions. Filtering removed 192 paralogous genes in each haploid genome and genes with TE-related functions, including 1,750 and 1,819 from  $a_1$  and  $a_2$  haploid genome, respectively.

| <b>Number of single-copy genes</b>                 | <b>Mating-type chromosome</b> | <b>Autosomes</b> |
|----------------------------------------------------|-------------------------------|------------------|
| Before filtering out genes of TE-related functions | 434                           | 10,018           |
| After filtering out genes of TE-related functions  | 371                           | 9,025            |

**Table S2.** Identification of differentially-expressed (DE) genes with either  $a_1$ -biased or  $a_2$ -biased expression (i.e., higher expression in  $a_1$  or  $a_2$ , respectively) under various  $\text{Log}_2(a_1/a_2)$  criteria.

| <b>DE criteria</b>          | <b><math>a_1</math> bias</b> | <b><math>a_2</math> bias</b> |
|-----------------------------|------------------------------|------------------------------|
| $\text{Log}_2(a_1/a_2) > 0$ | 392                          | 203                          |
| $\text{Log}_2(a_1/a_2) > 1$ | 286                          | 139                          |
| $\text{Log}_2(a_1/a_2) > 2$ | 112                          | 48                           |
| $\text{Log}_2(a_1/a_2) > 3$ | 65                           | 29                           |

**Table S3.** Numbers and percentages of genes with differential expression (DE) within genomic compartments, including autosomes, pseudo-autosomal regions (PARs), youngest and oldest evolutionary strata. Chi-squared test was used to assess whether DE genes were non-randomly distributed between autosomes and the genomic compartments on mating type chromosomes (MAT). *P* values <0.05 are in bold. NA: not applicable. The youngest strata only had one DE gene, so no statistical comparison could be performed for these strata.

|                                       | <b>Higher expression in a<sub>1</sub></b> |       |                 |                 | <b>Higher expression in a<sub>2</sub></b> |                 |                 |                 |
|---------------------------------------|-------------------------------------------|-------|-----------------|-----------------|-------------------------------------------|-----------------|-----------------|-----------------|
|                                       | Autosomes                                 | MAT   |                 |                 | Autosomes                                 | MAT             |                 |                 |
|                                       |                                           | PARs  | Youngest strata | Oldest Strata   |                                           | PARs            | Youngest strata | Oldest Strata   |
| DE gene number                        | 351                                       | 4     | 0               | 36              | 156                                       | 8               | 1               | 38              |
| Total number                          | 8207                                      | 114   | 29              | 198             | 8207                                      | 114             | 29              | 198             |
| Percentage                            | 4.28%                                     | 3.51% | 0.00%           | 18.18%          | 1.90%                                     | 7.02%           | 3.45%           | 19.19%          |
| X <sup>2</sup> test (X <sup>2</sup> ) | NA                                        | 0.02  | 1.24            | 68.91           | NA                                        | 11.60           | 0.04            | 210.95          |
| X <sup>2</sup> test ( <i>P</i> value) | NA                                        | 0.88  | 0.41            | <b>9.99E-05</b> | NA                                        | <b>6.60E-04</b> | 1               | <b>9.99E-05</b> |

**Table S4.** Wilcoxon rank sum test statistics for comparisons of mean non-synonymous substitution rate ( $dN$ , A) and synonymous substitution rate ( $dS$ , B) of differentially expressed genes (DE) versus non-differentially expressed genes (non-DE) within genomic compartments, i.e., autosomes, pseudo-autosomal regions (PARs), youngest and oldest evolutionary strata.  $P$  values  $<0.05$  are in bold. NA: not applicable, as the youngest strata only had one DE gene, no statistical comparison could be performed for this compartment.

(A)

| $dN$                   | Autosome | PARs | Young strata | Old Strata        |
|------------------------|----------|------|--------------|-------------------|
| Mean of DE genes       | 0        | 0    | 0.013        | 0.053             |
| Mean of non-DE genes   | 0        | 0    | 0.006        | 0.033             |
| Number of DE genes     | 117      | 4    | 1            | 43                |
| Number of non-DE genes | 5742     | 75   | 26           | 106               |
| Wilcoxon W             | 334269   | 146  | NA           | 1433              |
| $P$ -value             | 0.449    | 0.94 | NA           | <b>&lt; 0.001</b> |

(B)

| $dS$                   | Autosome | PARs  | Young strata | Old Strata        |
|------------------------|----------|-------|--------------|-------------------|
| Mean of DE genes       | 0        | 0     | 0.013        | 0.027             |
| Mean of non-DE genes   | 0        | 0     | 0.003        | 0.015             |
| Number of DE genes     | 117      | 4     | 1            | 43                |
| Number of non-DE genes | 5742     | 75    | 26           | 106               |
| Wilcoxon W             | 333918   | 116   | NA           | 1422              |
| $P$ -value             | 0.404    | 0.455 | NA           | <b>&lt; 0.001</b> |

**Table S5.** Wilcoxon rank sum test statistics for comparisons of divergence between each of the two *Microbotryum lychnidis-dioicae* alleles and their *M. lagerheimii* orthologs. This test assessed whether the allele with lower expression in *M. lychnidis-dioicae* was more divergent from orthologs in *M. lagerheimii* than the alleles with higher expression in *M. lychnidis-dioicae*, considering non-synonymous substitution rate ( $dN$ ), synonymous substitution rate ( $dS$ ), and the ratio ( $dN/dS$ ) within genomic compartments, including autosomes pseudo-autosomal regions (PARs), youngest and oldest evolutionary strata. We calculated these substitution rates for  $a_1$  and  $a_2$  alleles between these two species separately. NA: not applicable, as the youngest strata only had one DE gene, statistical comparisons could not be performed for this compartment.

| Substitution type | Autosome                   |                 | PARs                       |                 | Young strata               |                 | Old Strata                 |                 |
|-------------------|----------------------------|-----------------|----------------------------|-----------------|----------------------------|-----------------|----------------------------|-----------------|
|                   | High vs low mutation rates |                 | High vs low mutation rates |                 | High vs low mutation rates |                 | High vs low mutation rates |                 |
|                   | W                          | <i>P</i> -value |
| $dN$              | 8066.0                     | 0.999           | 18.5                       | 1.000           | NA                         | NA              | 1262.5                     | 0.934           |
| $dS$              | 8060.5                     | 0.995           | 19.0                       | 0.936           | NA                         | NA              | 1167.0                     | 0.909           |
| $dN/dS$           | 8057.0                     | 0.991           | 17.0                       | 0.936           | NA                         | NA              | 1247.5                     | 0.989           |



**Table S6.** Wilcoxon rank sum test statistics for comparisons of unoriented transposable element (TE) insertion differences between alleles (within 20kb up and downstream) of differentially expressed (DE) genes versus non-differentially expressed (non-DE) genes within genomic compartments, i.e., autosomes, pseudo-autosomal regions (PARs), youngest and oldest evolutionary strata. P-values <0.05 are in bold. NA: not applicable, as the youngest strata only had one DE gene, statistical comparisons could not be performed for this compartment.

| <b>Transposable elements (TEs)</b> | <b>Autosome</b>  | <b>PARs</b> | <b>Young strata</b> | <b>Old Strata</b> |
|------------------------------------|------------------|-------------|---------------------|-------------------|
| Difference of DE genes             | 0.312            | 0.333       | 1.000               | 4.567             |
| Differences of non-DE genes        | 0.107            | 0.078       | 2.143               | 3.903             |
| Number of DE genes                 | 507              | 12          | 1                   | 74                |
| Number of non-DE genes             | 7700             | 102         | 28                  | 124               |
| Wilcoxon W                         | 31387793         | 546         | NA                  | 4062              |
| <i>P</i> -value                    | <b>&lt;0.001</b> | 0.192       | NA                  | 0.173             |

**Table S7.** Two-proportion Z test for comparisons of unoriented protein length differences between alleles of differentially expressed (DE) genes versus non-differentially expressed (non-DE) genes within genomic compartments, i.e., autosomes, pseudo-autosomal regions (PARs), youngest and oldest evolutionary strata. *P* values <0.05 are in bold. NA: not applicable, as proportions \* sample size was less than five for the PARs and youngest strata, statistical comparisons could not be performed for these compartments.

| <b>Protein Length</b>                  | <b>Autosomes</b> | <b>PARs</b> | <b>Young strata</b> | <b>Old Strata</b> |
|----------------------------------------|------------------|-------------|---------------------|-------------------|
| Proportion unequal length DE genes     | 0.037            | 0.000       | 0.000               | 0.757             |
| Proportion unequal length non-DE genes | 0.012            | 0.020       | 0.357               | 0.605             |
| Number of DE genes                     | 507              | 12          | 1                   | 74.000            |
| Number of non-DE genes                 | 7700             | 102         | 28                  | 124               |
| <i>Z</i>                               | 4.640            | NA          | NA                  | 2.186             |
| <i>P</i> -value                        | <b>0.0002</b>    | NA          | NA                  | <b>0.029</b>      |

**Table S8.** Wilcoxon rank sum test statistics for comparisons of unoriented differences in intron content between alleles of differentially expressed (DE) versus non-differentially expressed (non-DE) genes within genomic compartments, i.e., autosomes, pseudo-autosomal regions (PARs), youngest and oldest evolutionary strata. *P* values <0.05 are in bold. NA: not applicable, as the youngest strata only had one DE gene, no statistical comparison could be performed for this compartment.

| <b>Intron</b>                     | <b>Autosomes</b> | <b>PARs</b> | <b>Young strata</b> | <b>Old Strata</b> |
|-----------------------------------|------------------|-------------|---------------------|-------------------|
| Difference between DE alleles     | 0.007            | 0.001       | 0.005               | 0.169             |
| Difference between non-DE alleles | 0.002            | 0.006       | 0.02                | 0.101             |
| Number of DE genes                | 507              | 12          | 1                   | 74                |
| Number of non-DE genes            | 7700             | 102         | 28                  | 124               |
| Wilcoxon W                        | 1920124          | 605         | NA                  | 3205              |
| <i>P</i> -value                   | <b>0.033</b>     | 0.888       | NA                  | <b>0.001</b>      |

**Table S9.** Wilcoxon rank-sum test statistics for comparisons of unoriented differences in overall GC content (GC0), and third codon position (GC3) between alleles of differentially expressed (DE) versus non-differentially expressed (non-DE) genes within genomic compartments, i.e., autosomes, pseudo-autosomal regions (PARs), youngest and oldest evolutionary strata. (A) Overall GC content. (B) Third codon position GC content. *P* values <0.05 are in bold. NA: not applicable, as the youngest strata only had one DE gene, no statistical comparison could be performed for this compartment.

(A)

| <b>GC0</b>                        | <b>Autosomes</b> | <b>PAR</b> | <b>Young strata</b> | <b>Old Strata</b> |
|-----------------------------------|------------------|------------|---------------------|-------------------|
| Difference between DE alleles     | 0.000124         | 0.00065    | 0.001373            | 0.01027           |
| Difference between non-DE alleles | 0.000081         | 0.000054   | 0.00171             | 0.0067            |
| Number of DE genes                | 507              | 12         | 1                   | 74                |
| Number of non-DE genes            | 7700             | 102        | 28                  | 124               |
| Wilcoxon W                        | 1907831          | 578        | NA                  | 3010              |
| <i>P</i> -value                   | <b>&lt;0.001</b> | 0.318      | NA                  | <b>&lt;0.001</b>  |

(B)

| <b>GC3</b>                        | <b>Autosomes</b> | <b>PAR</b> | <b>Young strata</b> | <b>Old Strata</b> |
|-----------------------------------|------------------|------------|---------------------|-------------------|
| Difference between DE alleles     | 0.000344         | 0          | 0.004464            | 0.02063           |
| Difference between non-DE alleles | 0.000081         | 0.000148   | 0.00423             | 0.01382           |
| Number of DE genes                | 507              | 12         | 1                   | 74                |
| Number of non-DE genes            | 7700             | 102        | 28                  | 124               |
| Wilcoxon W                        | 1903874          | 594        | NA                  | 3168              |
| <i>P</i> -value                   | <b>&lt;0.001</b> | 0.549      | NA                  | <b>0.001</b>      |

**References:**

1. Branco S, Badouin H, Rodríguez RC, Vega D, Gouzy J, Carpentier F. Evolutionary strata on young mating-type chromosomes despite the lack of sexual antagonism. *Proc Natl Acad Sci U S A*. 2017;114: 7367–7072. doi:10.1073/pnas.1701658114

## 1 **Supporting Information Legends**

2

3 **Table S1. Number of single-copy genes with alleles in both  $a_1$  and  $a_2$  haploid genomes,**  
4 **with the 70% protein sequence identity detection threshold using reciprocal best**  
5 **BLASTp hits, before and after filtering out genes with transposable element (TE)-**  
6 **related functions.**

7 Filtering removed 192 paralogous genes in each haploid genome and genes with TE-related  
8 functions, including 1,750 and 1,819 from  $a_1$  and  $a_2$  haploid genome, respectively.

9

10 **Table S2. Identification of differentially-expressed (DE) genes with either  $a_1$ -biased or**  
11  **$a_2$ -biased expression (i.e., higher expression in  $a_1$  or  $a_2$ , respectively) under various**  
12  **$\text{Log}_2(a_1/a_2)$  criteria.**

13

14 **Table S3. Numbers and percentages of genes with differential expression (DE) within**  
15 **genomic compartments, including autosomes, pseudo-autosomal regions (PARs),**  
16 **youngest and oldest evolutionary strata.**

17 Chi-squared test was used to assess whether DE genes were non-randomly distributed  
18 between autosomes and the genomic compartments on mating type chromosomes (MAT).  $P$   
19 values  $<0.05$  are in bold. NA: not applicable. The youngest strata only had one DE gene, so  
20 no statistical comparison could be performed for these strata.

21

22 **Table S4. Wilcoxon rank sum test statistics for comparisons of mean non-synonymous**  
23 **substitution rate ( $dN$ , A) and synonymous substitution rate ( $dS$ , B) of differentially**  
24 **expressed genes (DE) versus non-differentially expressed genes (non-DE) within**  
25 **genomic compartments, i.e., autosomes, pseudo-autosomal regions (PARs), youngest and**  
26 **oldest evolutionary strata.**

27  $P$  values  $<0.05$  are in bold. NA: not applicable, as the youngest strata only had one DE gene,  
28 no statistical comparison could be performed for this compartment.

29

30 **Table S5. Wilcoxon rank sum test statistics for comparisons of divergence between each**  
31 **of the two *Microbotryum lychnidis-dioicae* alleles and their *M. lagerheimii* orthologs.**

32 This test assessed whether the allele with lower expression in *M. lychnidis-dioicae* was more  
33 divergent from orthologs in *M. lagerheimii* than the alleles with higher expression in *M.*

34 *lychnidis-dioicae*, considering non-synonymous substitution rate ( $dN$ ), synonymous  
35 substitution rate ( $dS$ ), and the ratio ( $dN/dS$ ) within genomic compartments, including  
36 autosomes pseudo-autosomal regions (PARs), youngest and oldest evolutionary strata. We  
37 calculated these substitution rates for  $a_1$  and  $a_2$  alleles between these two species separately.  
38 NA: not applicable, as the youngest strata only had one DE gene, statistical comparisons  
39 could not be performed for this compartment.

40

41 **Table S6. Wilcoxon rank sum test statistics for comparisons of unoriented transposable**  
42 **element (TE) insertion differences between alleles (within 20kb up and downstream) of**  
43 **differentially expressed (DE) genes versus non-differentially expressed (non-DE) genes**  
44 **within genomic compartments, i.e., autosomes, pseudo-autosomal regions (PARs),**  
45 **youngest and oldest evolutionary strata.**

46 P-values  $<0.05$  are in bold. NA: not applicable, as the youngest strata only had one DE gene,  
47 statistical comparisons could not be performed for this compartment.

48

49 **Table S7. Two-proportion Z test for comparisons of unoriented protein length**  
50 **differences between alleles of differentially expressed (DE) genes versus non-**  
51 **differentially expressed (non-DE) genes within genomic compartments, i.e., autosomes,**  
52 **pseudo-autosomal regions (PARs), youngest and oldest evolutionary strata.**

53 P values  $<0.05$  are in bold. NA: not applicable, as proportions \* sample size was less than  
54 five for the PARs and youngest strata, statistical comparisons could not be performed for  
55 these compartments.

56

57 **Table S8. Wilcoxon rank sum test statistics for comparisons of unoriented differences in**  
58 **intron content between alleles of differentially expressed (DE) versus non-differentially**  
59 **expressed (non-DE) genes within genomic compartments, i.e., autosomes, pseudo-**  
60 **autosomal regions (PARs), youngest and oldest evolutionary strata.**

61 P values  $<0.05$  are in bold. NA: not applicable, as the youngest strata only had one DE gene,  
62 no statistical comparison could be performed for this compartment.

63

64 **Table S9. Wilcoxon rank-sum test statistics for comparisons of unoriented differences in**  
65 **overall GC content (GC0), and third codon position (GC3) between alleles of**  
66 **differentially expressed (DE) versus non-differentially expressed (non-DE) genes within**

67 **genomic compartments, i.e., autosomes, pseudo-autosomal regions (PARs), youngest and**  
68 **oldest evolutionary strata.**

69 (A) Overall GC content. (B) Third codon position GC content. *P* values <0.05 are in bold. NA:  
70 not applicable, as the youngest strata only had one DE gene, no statistical comparison could  
71 be performed for this compartment.

72

73 **Fig. S1. Comparison of proportion (A) and number (B) of differentially expressed (DE)**  
74 **genes detected between a<sub>1</sub> and a<sub>2</sub> haploid genomes of *Microbotryum lychnidis-dioicae*.**

75 Differentially expressed (DE) genes on mating-type chromosome (MAT) chromosomes and  
76 autosomes (auto), at various percentage protein sequence identities used as threshold for  
77 identification of alleles for genes in a<sub>1</sub> and a<sub>2</sub> haploid genomes. \*\*: *P* < 0.01 using Chi-square  
78 test. All other comparisons of DE genes on mating-type chromosome and autosomes were not  
79 significant.

80

81 **Fig. S2. Pairwise correlation of raw counts from RNAseq data between replicates for**  
82 **haploid a<sub>1</sub> cell culture (A) and haploid a<sub>2</sub> cell culture (B).**

83

84 **Fig. S3. Multidimensional scaling (MDS) plot of RNAseq libraries of *Microbotryum***  
85 ***lychnidis-dioicae*.**

86 Water denotes water agar (i.e. low nutrients) culture condition.

87

88 **Fig. S4. Boxplot of overall gene expression in terms of Log<sub>2</sub>TPM (transcripts per**  
89 **millions) for genes with a<sub>1</sub>-biased expression (in red), a<sub>2</sub>-biased expression (in blue) and**  
90 **non-biased expression (in grey) on mating-type chromosomes (MAT), as well as**  
91 **autosomes (Chr01-Chr18 and other contigs).**

92 Within each color, the slightly brighter color indicates a<sub>1</sub> alleles, the other being a<sub>2</sub> alleles. For  
93 boxplot, the horizontal bars (from bottom to top) represent the 25% quartile, median and 75%  
94 quartile respectively.

95

96 **Fig. S5. The ratio index of coding sequence and protein sequence of *Microbotryum***  
97 ***lychnidis-dioicae*.**

98 The ratio of predicted coding sequence length divided by the predicted protein sequence  
99 length multiplied by three for a<sub>1</sub>-bias expression (in blue), a<sub>2</sub>-biased expression (in red) and



100 non-biased expression (in grey), among the four genomic compartments. Within each color,  
101 the slightly brighter color indicates  $a_1$  alleles, the other being  $a_2$  alleles. In the boxplot, the  
102 horizontal bars (from bottom to top) represent the 25% quartile, median and 75% quartile,  
103 respectively.

104

105 **Fig. S6. Boxplot of synonymous substitution rate ( $dS$ ) for differentially expressed (DE)**  
106 **and non-differentially expressed (Non-DE) genes of *Microbotryum lychnidis-dioicae*.**

107 Wilcoxon rank sum tests for comparisons of mean non-synonymous substitution rate ( $dN$ ) of  
108 differentially expressed genes (DE) versus non-differentially expressed genes (non-DE)  
109 within genomic compartments: ‘\*\*\*’:  $P < 0.001$ , other comparisons were not significant.  
110 Genomic compartments correspond to autosomes, pseudo-autosomal regions (PARs),  
111 youngest and oldest evolutionary strata. For boxplot, the horizontal bars (from bottom to top)  
112 represent the 25% quartile, median and 75% quartile respectively.

113

114 **Fig. S7. Boxplot of differentially ( $a_1$ -biased in red,  $a_2$ -biased in blue) and non-**  
115 **differentially expressed genes (not-biased in grey) and the sequence divergence between**  
116 **alleles of *Microbotryum lychnidis-dioicae*.**

117 Wilcoxon rank sum tests for comparisons of genes with higher allelic expression in the  $a_1$  and  
118  $a_2$  haploid mating type genomes separately to non-differentially expressed genes for the mean  
119 non-synonymous substitution rate ( $dN$ ) (A), synonymous substitution rate ( $dS$ ) (B); ‘\*\*\*’:  $P <$   
120  $0.001$ , ‘\*\*’:  $P < 0.01$ , ‘\*’:  $P < 0.5$ , ‘.’:  $P < 0.1$ , NS: not significant. As  $dN$  and  $dS$  of almost all  
121 genes in autosomes and PARs are zero, and there is only one DE gene on the youngest strata,  
122 so no statistical test can be performed in these regions. Sample size for each genomic  
123 compartment is listed either above or inside the boxplot. Genomic compartments correspond  
124 to autosomes, pseudo-autosomal regions (PARs), youngest and oldest evolutionary strata. For  
125 boxplot, the horizontal bars (from bottom to top) represent the 25% quartile, median and 75%  
126 quartile respectively.

127

128 **Fig. S8. Boxplot of differentially expressed (DE) and non-differentially expressed genes**  
129 **(non-DE) and gene evolutionary rate  $dN/dS$  of *Microbotryum lychnidis-dioicae*.**

130 Wilcoxon rank sum tests for comparisons of evolutionary rate  $dN/dS$  of differentially  
131 expressed genes (DE) versus non-differentially expressed genes (non-DE) within genomic  
132 compartments; NS: not significant. As  $dN/dS$  of almost all genes in autosomes and PARs are

133 zero, and there is only one DE gene on the youngest strata, no statistical test can be performed  
134 in these regions. Genomic compartments correspond to autosomes, pseudo-autosomal regions  
135 (PARs), youngest and oldest evolutionary strata. For boxplot, the horizontal bars (from  
136 bottom to top) represent the 25% quartile, median and 75% quartile respectively.

137

138 **Fig. S9. Boxplot of sequence divergence, non-synonymous substitution rate  $dN$  (A),**  
139 **synonymous substitution rate  $dS$  (B), between *Microbotryum lychnidis-dioicae* and *M.***  
140 ***lagerheimii*.**

141 Alleles of differentially-expressed genes with higher (red - lower expressed allele) and lower  
142 (blue - higher expressed allele) substitution rates and equal (grey; non-differentially expressed  
143 genes) mutation rates were pooled from  $a_1$  and  $a_2$  genomes and assessed for divergences from  
144 orthologs in *M. lagerheimii*. Genomic compartments correspond to autosomes, pseudo-  
145 autosomal regions (PARs), youngest and oldest evolutionary strata. For boxplot, the  
146 horizontal bars (from bottom to top) represent the 25% quartile, median and 75% quartile  
147 respectively.

148

149 **Fig. S10. Dot plot of oriented differences of transposable element (TE) insertions and**  
150 **differential gene expression between alleles of *Microbotryum lychnidis-dioicae*.**

151 TE insertions are shown for sliding-window intervals from upstream to downstream of genes,  
152 where differences between alleles were calculated as the TE number for the allele with lower  
153 expression minus the TE number for the higher expressed allele; a positive value thus  
154 represented an excess of TEs in the lower expressed allele. Sliding window intervals are  
155 shown as **A**: upstream 20kb to 10kb, **B**: upstream 15kb to 5kb, **C**: upstream 10kb to gene, **D**:  
156 upstream 5kb to downstream 5kb, **E**: gene to downstream 10kb, **F**: downstream 5kb to 15kb,  
157 and **G**: downstream 10kb to 20kb.

158

159 **Fig. S11. Comparisons of differentially expressed (DE) and non-differentially expressed**  
160 **(non-DE) genes between mating types of *Microbotryum lychnidis-dioicae* for differences**  
161 **between alleles in third codon position GC content (GC3) within genomic compartments.**

162 Wilcoxon rank sum test statistics for comparisons of unoriented differences in GC content of  
163 third codon position (GC3) between alleles of differentially expressed (DE) versus non-  
164 differentially expressed (non-DE) genes within genomic compartments; \*\*\*:  $P < 0.001$ , NS:  
165 non significant. Genomic compartments correspond to autosomes, pseudo-autosomal regions  
166 (PARs), youngest and oldest evolutionary strata. The notation “ $a$ ” indicates that the youngest

167 evolutionary strata contained only one DE gene, precluding comparisons to non-DE genes  
168 within this compartment.  
169
